# Supplementary material for: Rapid Cis–Trans Coevolution Driven by a Novel Gene Retroposed from a Eukaryotic Conserved CCR4–NOT Component in Drosophila
Source: MDPI journal article supplement (doi:10.3390/genes13010057), 2021-12-26

Supplementary Figure S1

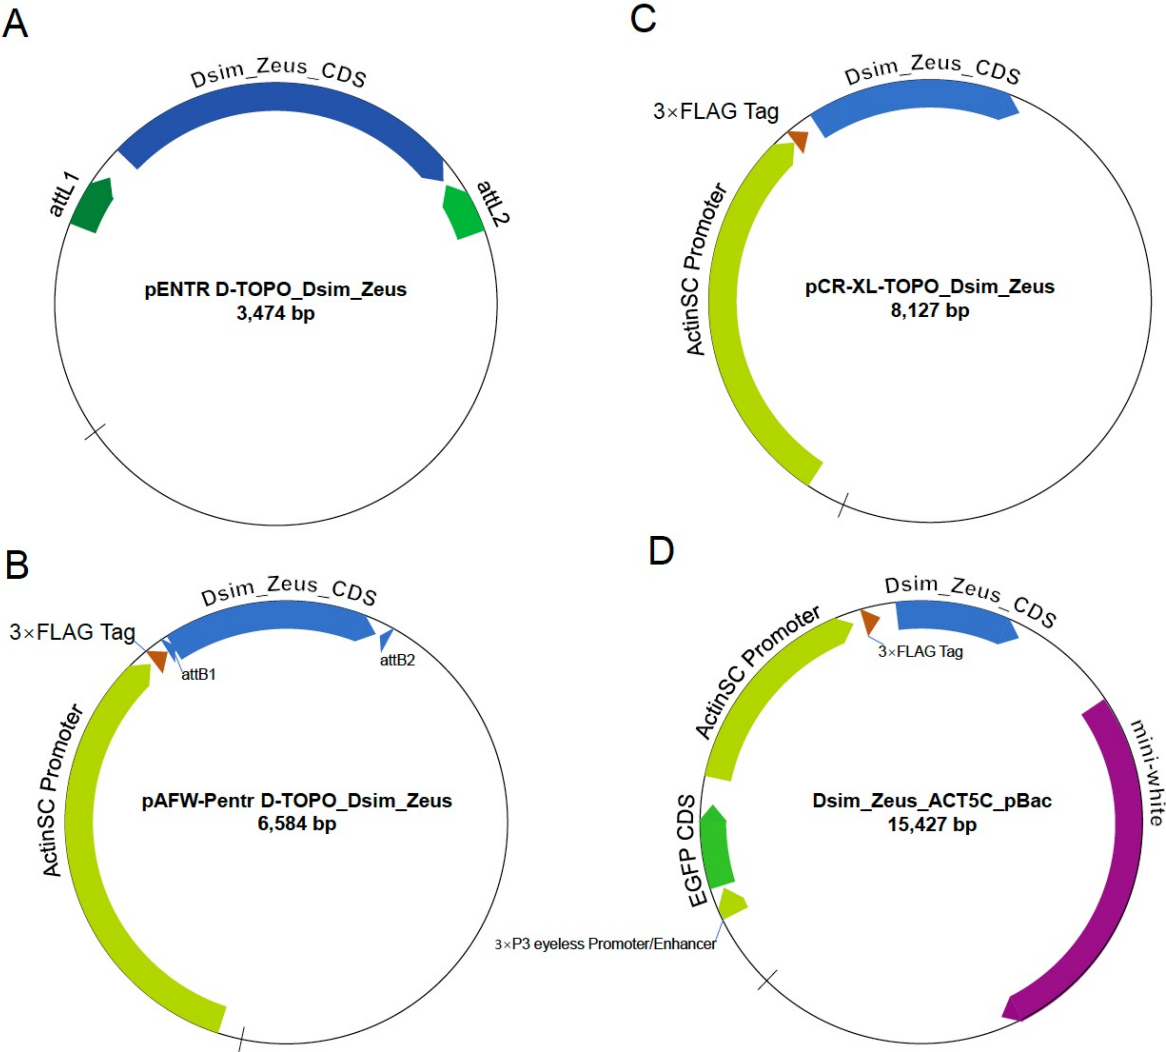

Supplementary Figure S2

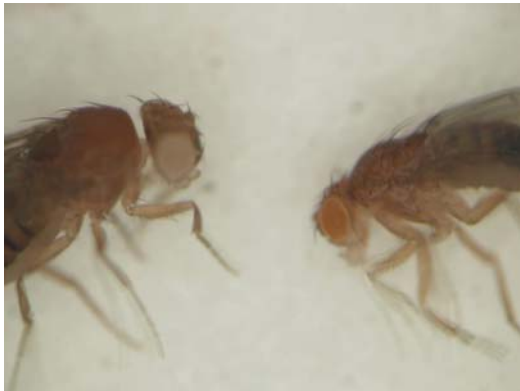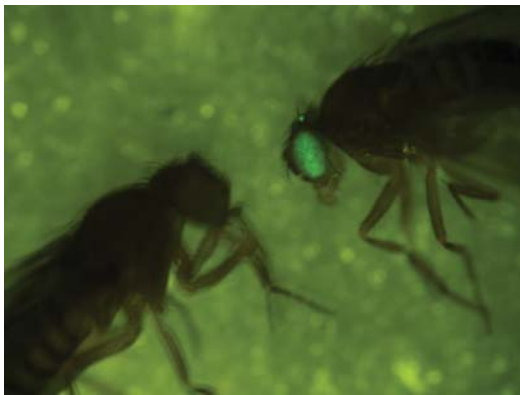

## Supplementary Figure S3

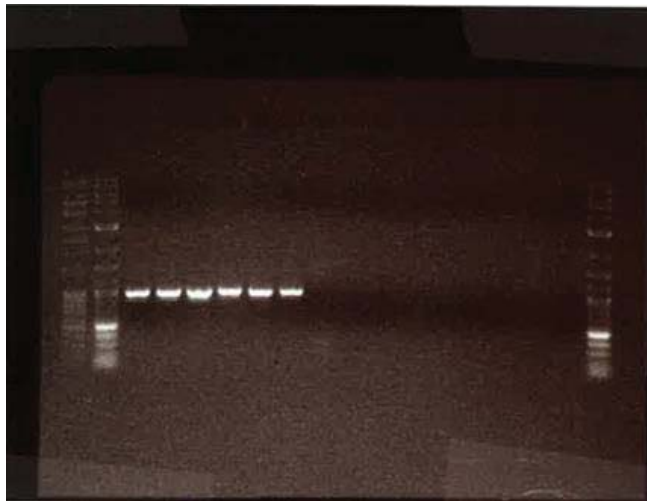

Supplementary Figure S4

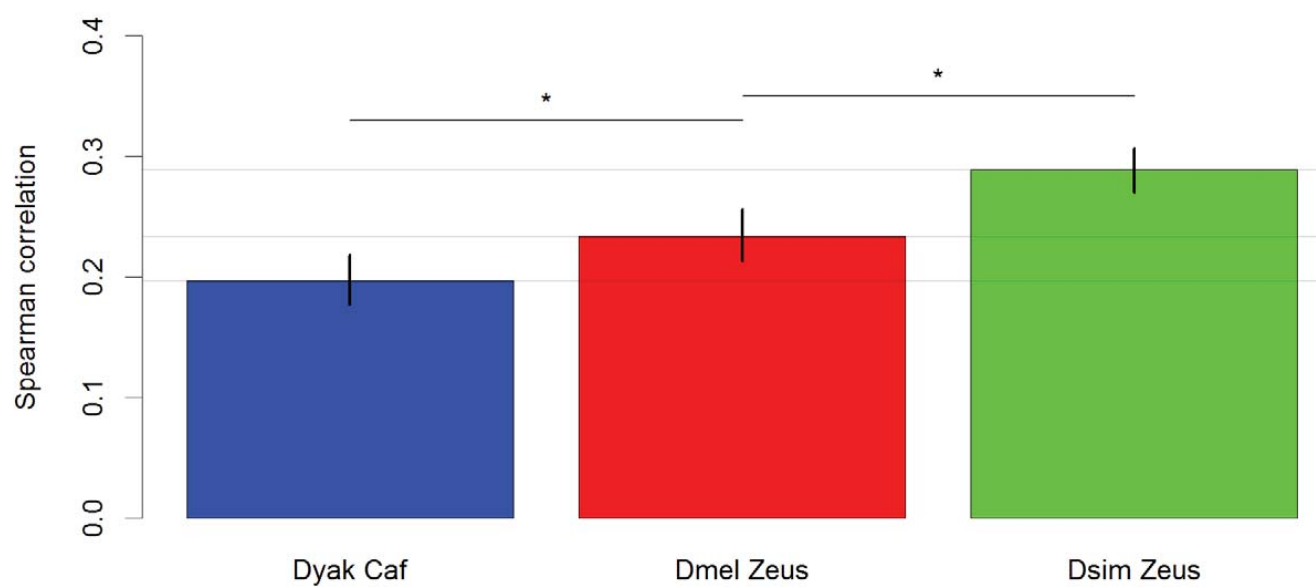

Supplementary Figure S5

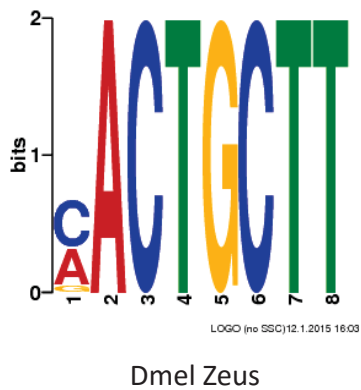

Supplementary Figure S6

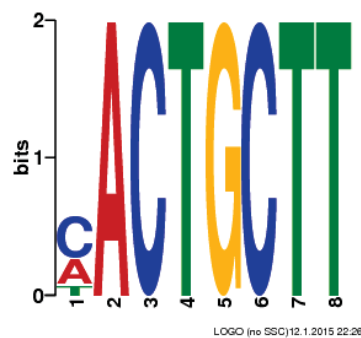

Dsim Zeus

Supplementary Figure S7

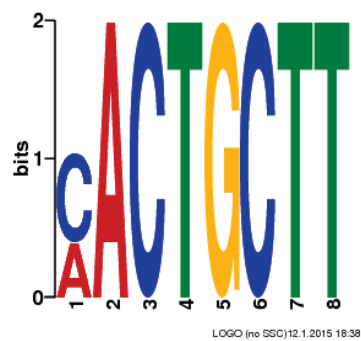

Dyak Caf

## Supplementary Figure S8

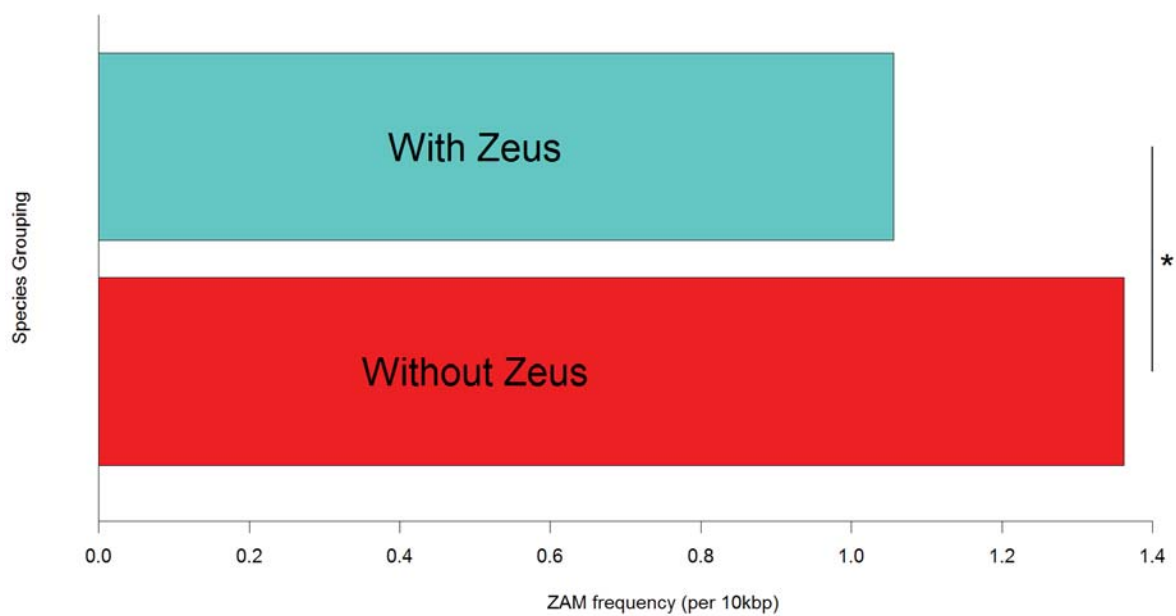



## Supplementary Figure S9

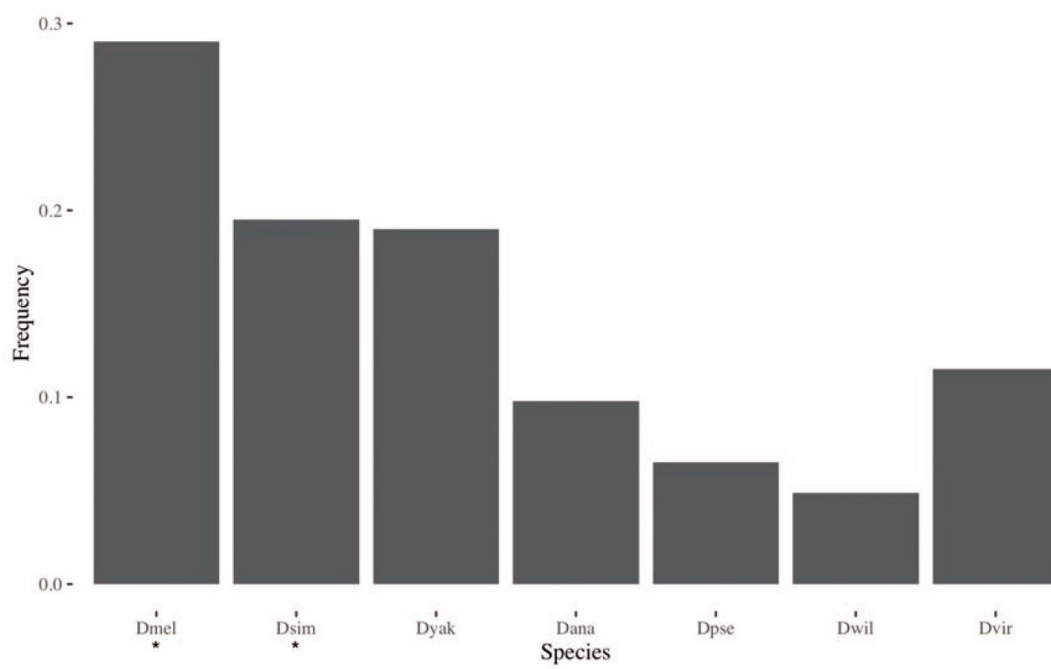

Supplementary Figure S10

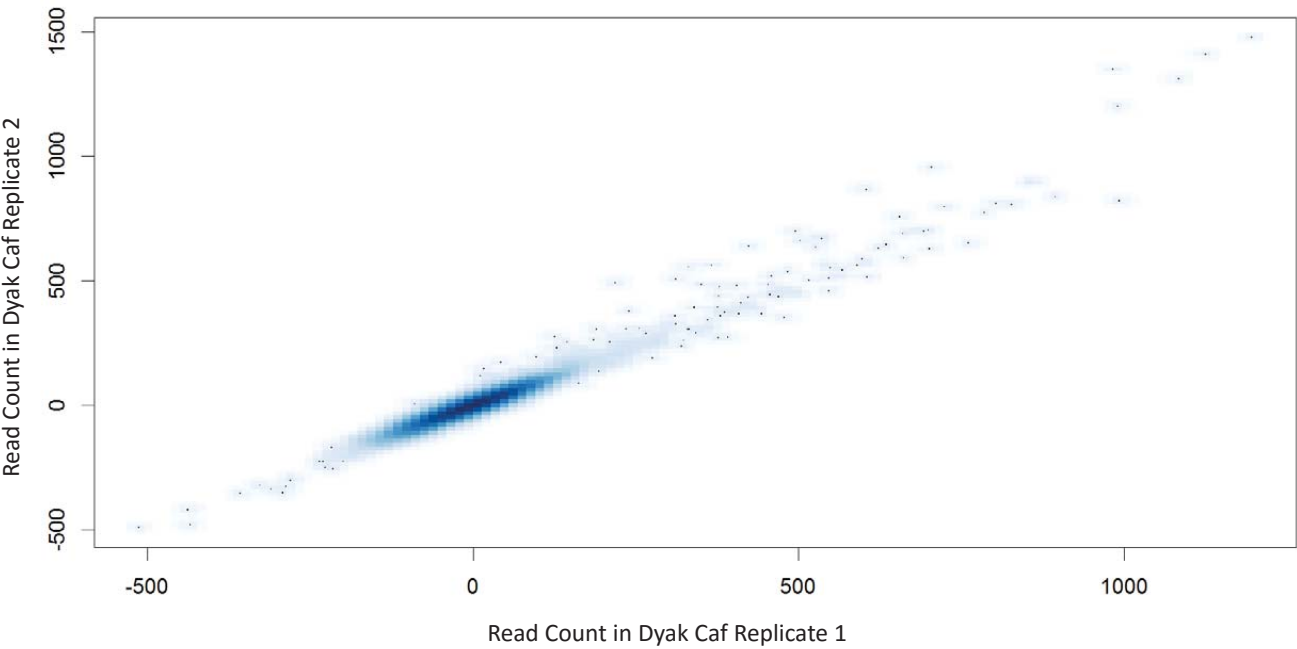

Supplementary Figure S11

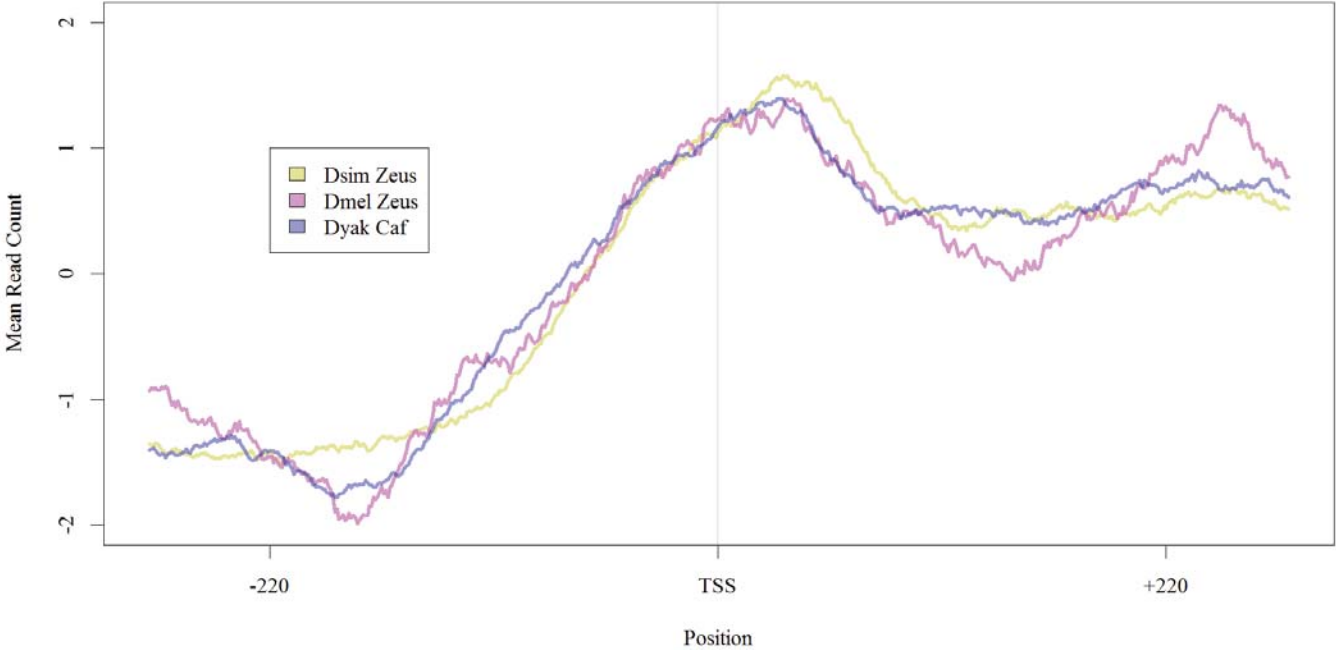

Supplementary Figure S12

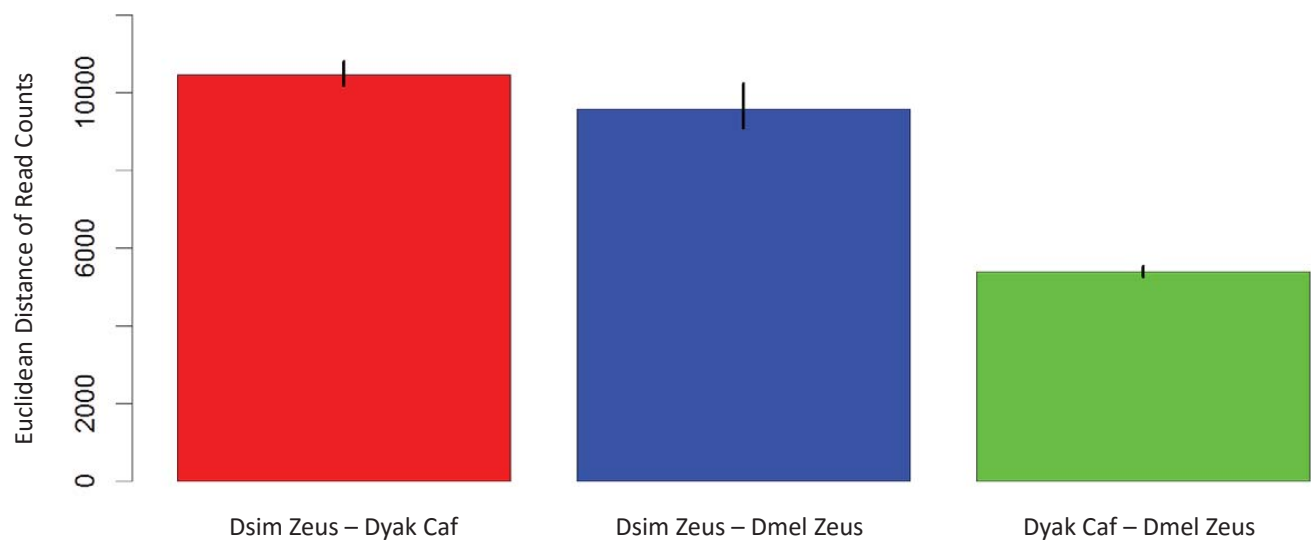

Supplementary Figure S13

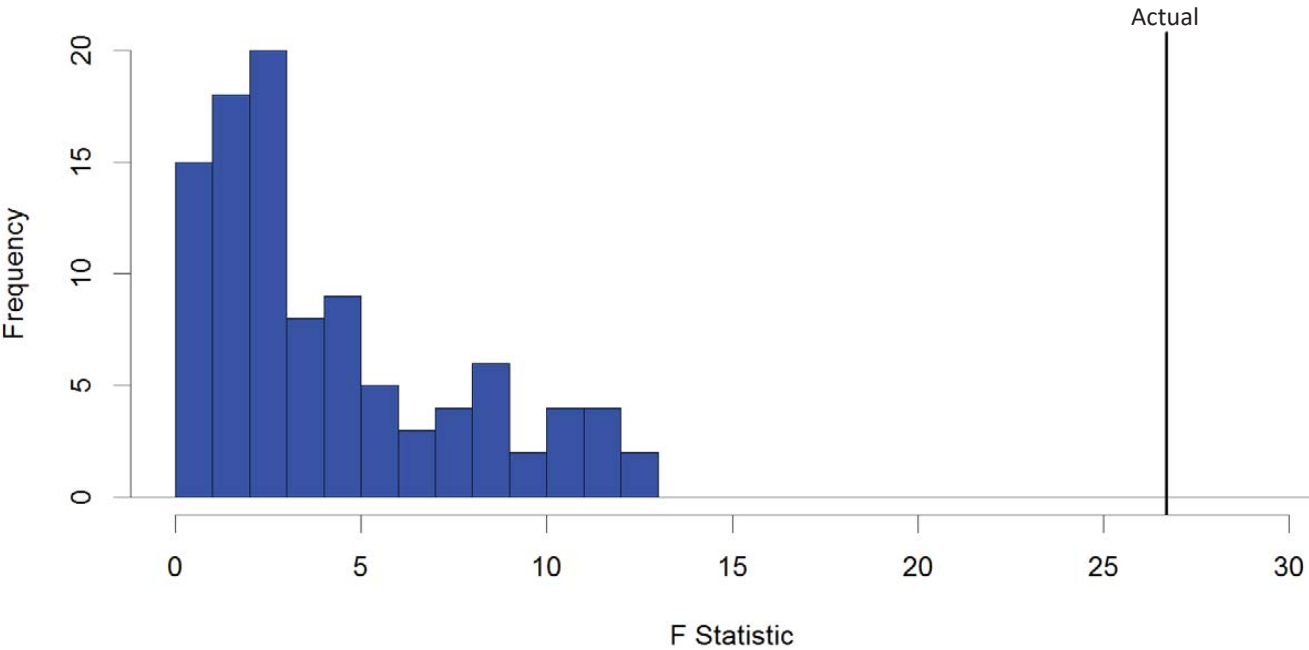

Supplement: s1 [file s1]
