# Supplementary material for: Rapid Cis–Trans Coevolution Driven by a Novel Gene Retroposed from a Eukaryotic Conserved CCR4–NOT Component in Drosophila
Source: Genes (Basel). 2021 Dec 26;13(1):57. doi: 10.3390/genes13010057 (PMC8774992; doi:10.3390/genes13010057)
Supplement: Supplementary file 1 [file genes-13-00057-s001.zip › 20211119_Supplementary tables.xlsx]

## Sheet: Table S1
Supplementary Table 1. Sequencing Statistics
Sequencing Run	Total Number of Reads	Uniquely Mapped Reads
DsimZeus R1	15685976	13742806
DsimZeus R2	17703437	16100441
DsimZeus R3	14311616	13379504
DsimZeus R4	11753476	10828897
DsimZeus Control	93919863	86594247
DmelZeus R1	7992058	7610238
DmelZeus R2	10683736	10156955
DmelZeus Control	59463883	56656319
DyakCaf R1	20406788	19556583
DyakCaf R2	19205968	18259221
DyakCaf R3	15741169	14912324
DyakCaf R4	11129675	10544158
DyakCaf Control	58159504	55486473

## Sheet: Table S2
Supplementary Table 2. CAZAM Motif Matches in Different Genomes
Species		Segment	Instances	Segment Length	Motifs/10kbp	Release
Species with Zeus	melanogaster	overall	15048	168736537	0.891804	dm3
	simulans	overall	14397	142420719	1.01088	droSim1
	sechellia	overall	15303	166577145	0.918673	droSec1
Species without Zeus	yakuba	overall	18893	168663877	1.12016	droYak2
	ananasae	overall	19586	230993012	0.847904	droAna3
	virilis	overall	19355	206026697	0.939441	droVir3
	pseudoobscura	overall	18385	152738921	1.20369	dp4
	erecta	overall	16486	152712140	1.07955	droEre2
	willistoni	overall	22288	236693122	0.941641	droWil1
Mean of Species with Zeus 0.940452043 Mean of Species without Zeus 1.022063214

## Sheet: Table S3
Supplementary Table 3. Modified McDonald-Kreitman Test, Considering SNPs of Minor Allele Frequency Greater Than 0.05
Motifs Located In	Motifs Mapped To	dN	dS	pN	pS	α	low CI	High CI	G test p-value
Pseudoobscura	Melanogaster	10688	10347	438	522	0.188429	0.084905	0.25202	0.00158604
Yakuba	Melanogaster	9556	8840	1280	1284	0.077809	0.031985	0.143098	0.0547342
Simulans	Melanogaster	4198	4207	1359	1342	-0.01496	-0.06728	0.071837	0.737124

## Sheet: Table S4
Supplementary Table 4. Modified McDonald-Kreitman Test, Considering SNPs of Minor Allele Frequency Greater Than 0.1
Motifs Located In	Motifs Mapped To	dN	dS	pN	pS	α	p-value
Pseudoobscura	Melanogaster	10007	9733	334	384	0.155124	<2.2x10-16
Yakuba	Melanogaster	9556	8840	985	968	0.058681	0.2069

## Sheet: Table S5
Supplementary Table 5. Modified McDonald-Kreitman Test, Incorporating Indels
Motifs Located In	Motifs Mapped To	Chromosome	dN	dS	pN	pS	α	low CI	High CI
Yakuba	Melanogaster	chrX	1413	1377	540	540	0.026057	-0.0670936	0.111082
Yakuba	Melanogaster	chr4	88	93	3	6	0.471591	0.172602	0.712941
Yakuba	Melanogaster	autosomes	9688	8928	7293	7192	0.065518	-7.94616e-05	0.12
Simulans	Melanogaster	chrX	666	699	873	926	0.011056	-0.140519	0.115534
Simulans	Melanogaster	chr4	57	54	13	13	0.087719	-0.313121	0.610105
Simulans	Melanogaster	autosomes	3994	3880	7762	7798	0.033028	-0.0211477	0.068727

## Sheet: Table S6
Supplementary Table 6. Modified McDonald-Kreitman Test, Using Nearby Synonymous Variation
Motifs Located In	Motifs Mapped To	dN	dS	pN	pS	α	p-value
Simulans	Melanogaster	4198	69121	1359	56491	0.603897	<2.2x10-16
Yakuba	Melanogaster	9556	18791	1280	59791	0.957902	<2.2x10-16

## Sheet: Table S7
Supplementary Table 7. Modified McDonald-Kreitman Test, Using Random Motifs
Sequence	Species	dN	dS	pN	pS	α	p-value
ACTGCTT	yakuba	9556	8840	1280	1284	0.077809	0.057384
ACTGCTT	pseudoobscura	10007	9733	438	522.5	0.184675	0.002291
GCTACTT	yakuba	6185	6202	971	968	-0.00586	0.924217
GCTACTT	pseudoobscura	5183	5841.5	252	322	0.117961	0.157561
TCAGCTT	yakuba	11600	11139.5	1879	1749.5	-0.03138	0.397578
TCAGCTT	pseudoobscura	12929	13514	773	709	-0.1396	0.01551
AGTCCTT	yakuba	6297	7934.5	1075	1211.5	-0.11807	0.014329
AGTCCTT	pseudoobscura	7932	8828	403	510	0.120543	0.065124
TCTGCTA	yakuba	5958	4737.5	872	657	-0.05536	0.342865
TCTGCTA	pseudoobscura	6938	6280	378	287	-0.19216	0.031235
ACTCGTT	yakuba	5785	5759.5	841	881	0.049611	0.337627
ACTCGTT	pseudoobscura	7383	7449.5	350	391.5	0.09795	0.183333
TCTGCAT	yakuba	8815	9871.5	1351	1450.5	-0.04303	0.308297
TCTGCAT	pseudoobscura	12648	13882.5	680	690	-0.0817	0.164622
CATGCTT	yakuba	5415	4939.5	713	699.5	0.070207	0.209563
CATGCTT	pseudoobscura	5940	5811	294	305	0.057	0.51013
ACTGTTC	yakuba	5937	5406.5	700	690	0.076157	0.172148
ACTGTTC	pseudoobscura	7997	7451.5	348	335	0.032054	0.705865
ACTTCTG	yakuba	8561	8381	1284	1274	0.013341	0.767708
ACTTCTG	pseudoobscura	9411	9679.5	450	484	0.043722	0.526649
ACCGTTT	yakuba	5637	5356	695	755.5	0.125937	0.017287
ACCGTTT	pseudoobscura	6435	6043.5	269	279	0.094501	0.274064
ACGTCTT	yakuba	3997	3715	462	503	0.146313	0.022495
ACGTCTT	pseudoobscura	4327	4068.5	230	220	0.017002	0.89756
ACTTCGT	yakuba	5889	5143.5	773	750	0.099807	0.057995
ACTTCGT	pseudoobscura	4825	4661.5	238	241	0.045912	0.649111
ATCGCTT	yakuba	8015	7826	1097	1139	0.059586	0.181208
ATCGCTT	pseudoobscura	8983	8560.5	435	427.5	0.030315	0.684434
ATTGCTC	yakuba	7475	7689	1220	1199	-0.04664	0.308076
ATTGCTC	pseudoobscura	9784	9647.5	569	506	-0.10882	0.106314
CCTGATT	yakuba	5781	6150.5	961	871.5	-0.17318	0.001597
CCTGATT	pseudoobscura	6882	7135	350	368.5	0.015287	0.870485
ATTGCCT	yakuba	7995	8304.5	1212	1297.5	0.029735	0.495212
ATTGCCT	pseudoobscura	10400	10694.5	533	559.5	0.020388	0.763559
ACTGTCT	yakuba	4410	4354	634	631	0.008004	0.917547
ACTGTCT	pseudoobscura	7027	6461	306	329	0.144824	0.059274

## Sheet: Table S8
Supplementary Table 8. Alignment statistics across all 6 samples of Zeus-KO and Ctrl-KO RNA-seq
sample	readGroup	totalReads	uniqulyHitReads	mappability	usableReads	Percent(usableReads)
KO-Ctrl__1	ML-IV-CD-1_S7	13593449	12632719	0.9293	11596059	0.8531
KO-Ctrl__2	ML-IV-CD-2_S8	16086598	15352363	0.9544	14160542	0.8803
KO-Ctrl__3	ML-IV-CD-3_S9	13714065	13084655	0.9541	12016769	0.8762
KO-Zeus__1	ML-IV-CZ-1_S4	15452531	14791985	0.9573	13689296	0.8859
KO-Zeus__2	ML-IV-CZ-2_S5	12533272	11933884	0.9522	10982218	0.8762
KO-Zeus__3	ML-IV-CZ-3_S6	18846182	17847705	0.947	16407064	0.8706

## Sheet: Table S9
Supplementary Table 9. 661 DEGs list between testis RNA-seq from Zeus-KO and Ctrl-KO
gene_id	gene	sample_1	sample_2	status	value_1	value_2	log2.fold_change.	test_stat	p_value	q_value	significant	DEG	baseMean	lfcSE	Signt
FBgn0000024	Ace	KO-Ctrl	KO-Zeus	OK	144.164	92.4432	-0.651919	-4.1203	3.78384e-05	0.000809686	Significant	-1	114.493	0.158221	-1
FBgn0000045	Act79B	KO-Ctrl	KO-Zeus	OK	78.9082	13.0946	-2.55012	-7.74727	9.38921e-15	8.42902e-13	Significant	-1	76.1877	0.329163	-1
FBgn0000078	Amy-d	KO-Ctrl	KO-Zeus	OK	1102.09	445.085	-1.3081	-7.64096	2.15611e-14	1.89128e-12	Significant	-1	1638.94	0.171195	-1
FBgn0000079	Amy-p	KO-Ctrl	KO-Zeus	OK	850.798	353.628	-1.26205	-10.0921	5.98874e-24	9.55786e-22	Significant	-1	2213.71	0.125054	-1
FBgn0000179	bi	KO-Ctrl	KO-Zeus	OK	58.6463	33.3029	-0.802262	-2.89698	0.00376772	0.0347471	Significant	-1	40.5103	0.27693	-1
FBgn0000241	bw	KO-Ctrl	KO-Zeus	OK	11.5301	28.3426	1.30283	3.29643	0.000979228	0.0121106	Significant	1	27.8502	0.395226	1
FBgn0000406	Cyt-b5-r	KO-Ctrl	KO-Zeus	OK	525.518	208.853	-1.3217	-10.9439	7.10604e-28	1.60109e-25	Significant	-1	288.806	0.12077	-1
FBgn0000414	Dab	KO-Ctrl	KO-Zeus	OK	161.343	270.356	0.731648	4.47315	7.70744e-06	0.000196814	Significant	1	213.654	0.163564	1
FBgn0000442	Pkg21D	KO-Ctrl	KO-Zeus	OK	50.6231	177.03	1.79023	8.49076	2.0529e-17	2.24666e-15	Significant	1	105.507	0.210844	1
FBgn0000451	ect	KO-Ctrl	KO-Zeus	OK	17.0853	42.8932	1.31969	3.30237	0.000958723	0.0119099	Significant	1	23.8205	0.39962	1
FBgn0000477	DNaseII	KO-Ctrl	KO-Zeus	OK	103.847	59.6608	-0.793381	-3.02293	0.00250338	0.0253671	Significant	-1	83.6811	0.262454	-1
FBgn0001083	fw	KO-Ctrl	KO-Zeus	OK	60.2878	33.8817	-0.831329	-3.28816	0.00100844	0.0124201	Significant	-1	47.7263	0.252825	-1
FBgn0001114	Glt	KO-Ctrl	KO-Zeus	OK	397.156	253.926	-0.658322	-5.10297	3.34372e-07	1.17142e-05	Significant	-1	223.643	0.129008	-1
FBgn0001208	Hn	KO-Ctrl	KO-Zeus	OK	100.248	49.0029	-1.04335	-4.22917	2.34557e-05	0.00053478	Significant	-1	43.6929	0.246703	-1
FBgn0001235	hth	KO-Ctrl	KO-Zeus	OK	123.68	232.499	0.916557	5.18994	2.10364e-07	7.79772e-06	Significant	1	177.599	0.176603	1
FBgn0001250	if	KO-Ctrl	KO-Zeus	OK	257.938	390.295	0.588865	4.43846	9.06044e-06	0.000227322	Significant	1	286.729	0.132673	1
FBgn0001285	Jon44E	KO-Ctrl	KO-Zeus	OK	131	296.279	1.17227	7.10064	1.24184e-12	9.20645e-11	Significant	1	326.731	0.165093	1
FBgn0001296	kar	KO-Ctrl	KO-Zeus	OK	110.774	173.368	0.629883	3.29599	0.00098076	0.0121106	Significant	1	164.566	0.191106	1
FBgn0001325	Kr	KO-Ctrl	KO-Zeus	OK	45.7867	24.1097	-0.958657	-2.8509	0.00435961	0.0389854	Significant	-1	29.7829	0.336265	-1
FBgn0001991	Ca-alpha1D	KO-Ctrl	KO-Zeus	OK	729.115	1172.88	0.683322	5.37675	7.58417e-08	3.05789e-06	Significant	1	893.71	0.127088	1
FBgn0002563	Lsp1beta	KO-Ctrl	KO-Zeus	OK	19.1442	2.69795	-2.77746	-3.73846	0.000185155	0.00305691	Significant	-1	7.51272	0.742942	-1
FBgn0002565	Lsp2	KO-Ctrl	KO-Zeus	OK	77.2575	173.452	1.15887	4.84967	1.23668e-06	3.76941e-05	Significant	1	71.4557	0.238959	1
FBgn0002570	Mal-A1	KO-Ctrl	KO-Zeus	OK	6545.62	3013.56	-1.11913	-13.4191	4.67263e-41	2.55682e-38	Significant	-1	4845.89	0.0833979	-1
FBgn0002578	Kaz-m1	KO-Ctrl	KO-Zeus	OK	43.2165	18.4314	-1.16948	-3.83138	0.000127427	0.00227935	Significant	-1	52.5492	0.305237	-1
FBgn0002778	mnd	KO-Ctrl	KO-Zeus	OK	92.0527	155.778	0.7588	4.55275	5.29496e-06	0.000139475	Significant	1	147.652	0.166669	1
FBgn0002855	Acp26Aa	KO-Ctrl	KO-Zeus	OK	14412.2	8196.81	-0.814067	-8.24367	1.67002e-16	1.74456e-14	Significant	-1	11902.6	0.0987505	-1
FBgn0002863	Acp95EF	KO-Ctrl	KO-Zeus	OK	20986.6	12222.4	-0.779853	-3.18414	0.00145186	0.0165838	Significant	-1	20033.4	0.244918	-1
FBgn0002887	mus201	KO-Ctrl	KO-Zeus	OK	307.652	466.712	0.592304	4.36897	1.24836e-05	0.00030717	Significant	1	533.076	0.135571	1
FBgn0002901	mus304	KO-Ctrl	KO-Zeus	OK	214.661	370.615	0.781826	5.8241	5.74198e-09	2.78207e-07	Significant	1	306.982	0.13424	1
FBgn0002906	Blm	KO-Ctrl	KO-Zeus	OK	283.579	548.062	0.942232	5.41934	5.98181e-08	2.45489e-06	Significant	1	562.562	0.173865	1
FBgn0002917	na	KO-Ctrl	KO-Zeus	OK	140.126	91.9664	-0.618979	-3.03549	0.00240148	0.024551	Significant	-1	113.628	0.203914	-1
FBgn0003255	rk	KO-Ctrl	KO-Zeus	OK	20.0001	8.214	-1.27811	-2.87089	0.00409321	0.0372408	Significant	-1	17.3864	0.445196	-1
FBgn0003308	ry	KO-Ctrl	KO-Zeus	OK	182.417	393.303	1.10146	8.93127	4.21135e-19	5.09396e-17	Significant	1	293.745	0.123326	1
FBgn0003358	Jon99Ci	KO-Ctrl	KO-Zeus	OK	1258.31	602.434	-1.06202	-5.44359	5.22171e-08	2.18192e-06	Significant	-1	973.079	0.195096	-1
FBgn0003366	sev	KO-Ctrl	KO-Zeus	OK	119.795	251.473	1.05417	5.06065	4.17834e-07	1.44184e-05	Significant	1	192.274	0.208307	1
FBgn0003411	sisA	KO-Ctrl	KO-Zeus	OK	33.3709	16.2317	-1.07041	-3.3888	0.000701993	0.00910452	Significant	-1	41.6851	0.315866	-1
FBgn0003515	st	KO-Ctrl	KO-Zeus	OK	185.687	334.745	0.845382	5.75255	8.79048e-09	4.17402e-07	Significant	1	268.762	0.146958	1
FBgn0003701	thr	KO-Ctrl	KO-Zeus	OK	370.805	563.525	0.596252	3.95137	7.77038e-05	0.00151338	Significant	1	427.8	0.150897	1
FBgn0003710	tipE	KO-Ctrl	KO-Zeus	OK	310.849	191.374	-0.699493	-4.84497	1.26634e-06	3.82934e-05	Significant	-1	150.883	0.144375	-1
FBgn0003747	Gr5a	KO-Ctrl	KO-Zeus	OK	0	15.1811	6.05831	4.87206	1.10438e-06	3.44849e-05	Significant	1	11.473	1.24348	1
FBgn0003863	alphaTry	KO-Ctrl	KO-Zeus	OK	4716.68	1965.92	-1.26193	-8.34802	6.94193e-17	7.45511e-15	Significant	-1	5030.25	0.151166	-1
FBgn0003867	tsl	KO-Ctrl	KO-Zeus	OK	28.8171	13.6709	-1.06658	-2.78506	0.00535185	0.0447862	Significant	-1	14.3036	0.382967	-1
FBgn0003886	alphaTub85E	KO-Ctrl	KO-Zeus	OK	123.771	226.579	0.873037	6.59217	4.33454e-11	2.67786e-09	Significant	1	582.354	0.132436	1
FBgn0003961	Uro	KO-Ctrl	KO-Zeus	OK	690.397	1195.42	0.795727	11.3898	4.70073e-30	1.20036e-27	Significant	1	1014.34	0.0698631	1
FBgn0004118	nAChRbeta2	KO-Ctrl	KO-Zeus	OK	66.5593	39.2092	-0.7396	-2.78733	0.00531437	0.0447053	Significant	-1	42.7282	0.265343	-1
FBgn0004169	up	KO-Ctrl	KO-Zeus	OK	814.357	1443.3	0.827289	7.90032	2.78182e-15	2.66383e-13	Significant	1	1173.19	0.104716	1
FBgn0004181	Ebp	KO-Ctrl	KO-Zeus	OK	2388.11	5111.32	1.09752	6.23748	4.44668e-10	2.46844e-08	Significant	1	5172.92	0.175956	1
FBgn0004198	ct	KO-Ctrl	KO-Zeus	OK	382.399	612.766	0.674355	3.92125	8.80904e-05	0.0016759	Significant	1	502.393	0.171974	1
FBgn0004240	DptA	KO-Ctrl	KO-Zeus	OK	76.8113	40.027	-0.948107	-2.91734	0.00353036	0.0331162	Significant	-1	36.0765	0.324991	-1
FBgn0004378	Klp61F	KO-Ctrl	KO-Zeus	OK	307.407	472.179	0.610918	4.85429	1.20819e-06	3.70222e-05	Significant	1	350.155	0.125851	1
FBgn0004414	msopa	KO-Ctrl	KO-Zeus	OK	8681.12	2987.8	-1.5385	-15.0015	7.17984e-51	1.03129e-47	Significant	-1	7585.24	0.102557	-1
FBgn0004425	LysB	KO-Ctrl	KO-Zeus	OK	279.537	135.175	-1.02869	-4.58332	4.57653e-06	0.000123448	Significant	-1	188.064	0.224443	-1
FBgn0004427	LysD	KO-Ctrl	KO-Zeus	OK	1027.17	380.704	-1.42249	-11.2302	2.89749e-29	6.93646e-27	Significant	-1	676.889	0.126667	-1
FBgn0004428	LysE	KO-Ctrl	KO-Zeus	OK	136.532	411.341	1.60136	11.8459	2.25879e-32	7.20993e-30	Significant	1	305.715	0.135182	1
FBgn0004430	LysS	KO-Ctrl	KO-Zeus	OK	52.1715	10.9979	-2.23203	-5.64442	1.65741e-08	7.45172e-07	Significant	-1	31.1013	0.395441	-1
FBgn0004513	Mdr65	KO-Ctrl	KO-Zeus	OK	46.0396	81.8935	0.82837	3.88166	0.000103748	0.00192495	Significant	1	63.493	0.213406	1
FBgn0004620	GluRIIA	KO-Ctrl	KO-Zeus	OK	54.8888	84.0953	0.601991	2.76102	0.00576217	0.0473021	Significant	1	74.8213	0.218032	1
FBgn0004780	Ccp84Ad	KO-Ctrl	KO-Zeus	OK	126.013	45.9839	-1.43556	-5.83068	5.52033e-09	2.69932e-07	Significant	-1	80.4124	0.246208	-1
FBgn0005670	Cyp4d1	KO-Ctrl	KO-Zeus	OK	32.7845	87.0662	1.43996	6.10413	1.03361e-09	5.55012e-08	Significant	1	73.2085	0.235899	1
FBgn0010019	Cyp4g1	KO-Ctrl	KO-Zeus	OK	8622.92	15634.4	0.858342	7.33072	2.28928e-13	1.8433e-11	Significant	1	7854.4	0.117088	1
FBgn0010038	GstD2	KO-Ctrl	KO-Zeus	OK	42.4978	27.2887	-0.65954	-2.46047	0.0138754	0.0872223	Significant	-1	34.1878	0.268054	-1
FBgn0010044	GstD8	KO-Ctrl	KO-Zeus	OK	39.1178	11.1469	-1.78534	-4.55003	5.3639e-06	0.000140083	Significant	-1	16.2059	0.39238	-1
FBgn0010194	Wnt5	KO-Ctrl	KO-Zeus	OK	99.9436	156.619	0.648391	2.68378	0.00727954	0.0553968	Significant	1	138.78	0.241596	1
FBgn0010357	betaTry	KO-Ctrl	KO-Zeus	OK	6620.23	2042.1	-1.69624	-12.708	5.33856e-37	2.66719e-34	Significant	-1	5583.93	0.133478	-1
FBgn0010385	Def	KO-Ctrl	KO-Zeus	OK	35.6215	0.295973	-6.51925	-5.14196	2.71893e-07	9.76351e-06	Significant	-1	6.0963	1.26785	-1
FBgn0010399	Nmdar1	KO-Ctrl	KO-Zeus	OK	59.3651	38.6319	-0.618	-2.52749	0.011488	0.0763058	Significant	-1	53.0147	0.244511	-1
FBgn0010423	TpnC47D	KO-Ctrl	KO-Zeus	OK	129.59	196.763	0.614612	4.184	2.86421e-05	0.000640324	Significant	1	189.342	0.146896	1
FBgn0010425	epsilonTry	KO-Ctrl	KO-Zeus	OK	543.495	183.305	-1.56119	-9.62982	5.98348e-22	8.70332e-20	Significant	-1	885.385	0.162121	-1
FBgn0010431	mtrm	KO-Ctrl	KO-Zeus	OK	60.2184	93.8825	0.635877	3.27503	0.00105652	0.0128468	Significant	1	66.0858	0.194159	1
FBgn0010497	dmGlut	KO-Ctrl	KO-Zeus	OK	242.905	375.133	0.620652	5.40483	6.48681e-08	2.65267e-06	Significant	1	485.579	0.114833	1
FBgn0010651	MFS14	KO-Ctrl	KO-Zeus	OK	359.141	770.077	1.1037	11.9043	1.12438e-32	3.80007e-30	Significant	1	553.979	0.0927149	1
FBgn0010812	unc-45	KO-Ctrl	KO-Zeus	OK	305.582	483.675	0.651857	6.09512	1.09354e-09	5.81755e-08	Significant	1	416.876	0.106947	1
FBgn0011559	Acp36DE	KO-Ctrl	KO-Zeus	OK	53498.8	33757	-0.664391	-4.2535	2.10453e-05	0.000488549	Significant	-1	53228.3	0.156199	-1
FBgn0011603	ine	KO-Ctrl	KO-Zeus	OK	127.292	215.115	0.748786	4.84388	1.2733e-06	3.83077e-05	Significant	1	174.336	0.154584	1
FBgn0011653	mas	KO-Ctrl	KO-Zeus	OK	14.6952	39.0617	1.38833	3.6208	0.000293689	0.00442305	Significant	1	23.8209	0.383432	1
FBgn0011668	Mst57Da	KO-Ctrl	KO-Zeus	OK	39034.5	22647.3	-0.785307	-4.62693	3.71121e-06	0.000101779	Significant	-1	34410.9	0.169725	-1
FBgn0011669	Mst57Db	KO-Ctrl	KO-Zeus	OK	39592.1	21886.8	-0.855028	-5.75027	8.90999e-09	4.21336e-07	Significant	-1	36351.3	0.148693	-1
FBgn0011670	Mst57Dc	KO-Ctrl	KO-Zeus	OK	6703.7	4115.17	-0.703474	-3.73322	0.000189046	0.00309891	Significant	-1	6609.95	0.188436	-1
FBgn0011761	dhd	KO-Ctrl	KO-Zeus	OK	91.3454	56.8216	-0.662446	-3.20768	0.0013381	0.0156421	Significant	-1	79.3863	0.206519	-1
FBgn0011834	Ser6	KO-Ctrl	KO-Zeus	OK	264.187	123.931	-1.08573	-7.13972	9.35193e-13	7.21229e-11	Significant	-1	278.984	0.152069	-1
FBgn0013277	Hsp70Ba	KO-Ctrl	KO-Zeus	OK	6.72589	20.3865	1.59739	3.19619	0.00139257	0.0161148	Significant	1	9.40469	0.49978	1
FBgn0013278	Hsp70Bb	KO-Ctrl	KO-Zeus	OK	19.696	54.0064	1.45556	4.09696	4.18618e-05	0.000881015	Significant	1	39.0993	0.355279	1
FBgn0013279	Hsp70Bc	KO-Ctrl	KO-Zeus	OK	7.84291	20.8637	1.44251	3.26095	0.00111042	0.0133471	Significant	1	19.9762	0.442359	1
FBgn0013307	Odc1	KO-Ctrl	KO-Zeus	OK	47.8969	29.2535	-0.680467	-2.54402	0.0109584	0.0741594	Significant	-1	51.1689	0.267477	-1
FBgn0013751	Awh	KO-Ctrl	KO-Zeus	OK	73.7966	40.5723	-0.84726	-3.91402	9.07722e-05	0.00171839	Significant	-1	59.1971	0.216468	-1
FBgn0013949	Elal	KO-Ctrl	KO-Zeus	OK	35.3091	11.0136	-1.65528	-3.62539	0.000288524	0.00437392	Significant	-1	16.0521	0.456579	-1
FBgn0014469	Cyp4e2	KO-Ctrl	KO-Zeus	OK	581.797	1004.56	0.786171	7.29601	2.9642e-13	2.36539e-11	Significant	1	782.678	0.107754	1
FBgn0014865	Mtk	KO-Ctrl	KO-Zeus	OK	16.6466	3.22691	-2.37426	-3.53699	0.000404709	0.00580588	Significant	-1	11.8899	0.671264	-1
FBgn0015001	iotaTry	KO-Ctrl	KO-Zeus	OK	84.665	141.713	0.759445	3.49759	0.000469478	0.00651918	Significant	1	166.382	0.217134	1
FBgn0015010	Ag5r	KO-Ctrl	KO-Zeus	OK	65.1169	215.986	1.73319	8.90519	5.32958e-19	6.37939e-17	Significant	1	98.1844	0.194627	1
FBgn0015034	Cyp4e1	KO-Ctrl	KO-Zeus	OK	490.746	310.866	-0.657456	-5.51257	3.53633e-08	1.52195e-06	Significant	-1	361.312	0.119265	-1
FBgn0015038	Cyp9b1	KO-Ctrl	KO-Zeus	OK	22.3927	11.3437	-0.987134	-2.62105	0.00876599	0.063512	Significant	-1	25.4417	0.376618	-1
FBgn0015039	Cyp9b2	KO-Ctrl	KO-Zeus	OK	518.976	330.276	-0.642954	-6.33486	2.37554e-10	1.35135e-08	Significant	-1	390.923	0.101495	-1
FBgn0015570	alpha-Est2	KO-Ctrl	KO-Zeus	OK	33.5329	11.7008	-1.50819	-3.16054	0.00157476	0.017637	Significant	-1	16.3378	0.477195	-1
FBgn0015575	alpha-Est7	KO-Ctrl	KO-Zeus	OK	370.485	203.201	-0.862189	-7.12724	1.02398e-12	7.84437e-11	Significant	-1	277.36	0.120971	-1
FBgn0015586	Acp76A	KO-Ctrl	KO-Zeus	OK	5922.22	2651.73	-1.15837	-11.322	1.02145e-29	2.49734e-27	Significant	-1	5777.88	0.102312	-1
FBgn0015770	MstProx	KO-Ctrl	KO-Zeus	OK	86.5916	55.1036	-0.659891	-3.07999	0.00207005	0.0219033	Significant	-1	61.7169	0.214251	-1
FBgn0016036	mei-P22	KO-Ctrl	KO-Zeus	OK	9.75384	40.8782	2.07523	5.66457	1.4739e-08	6.74765e-07	Significant	1	25.5764	0.366352	1
FBgn0016684	NaPi-T	KO-Ctrl	KO-Zeus	OK	684.259	1049.29	0.612821	6.98851	2.77816e-12	1.99524e-10	Significant	1	949.527	0.0876897	1
FBgn0016920	nompC	KO-Ctrl	KO-Zeus	OK	45.9966	27.0372	-0.756093	-2.76523	0.00568831	0.0468561	Significant	-1	25.8784	0.273429	-1
FBgn0017448	CG2187	KO-Ctrl	KO-Zeus	OK	265.798	548.203	1.04026	9.58572	9.18106e-22	1.30246e-19	Significant	1	340.524	0.108522	1
FBgn0019928	Ser8	KO-Ctrl	KO-Zeus	OK	148.314	323.372	1.12693	5.46145	4.72274e-08	1.99518e-06	Significant	1	259.345	0.206344	1
FBgn0020509	Acp62F	KO-Ctrl	KO-Zeus	OK	5671.44	3586.99	-0.66022	-3.90761	9.32143e-05	0.00175883	Significant	-1	5907.87	0.168958	-1
FBgn0020513	ade5	KO-Ctrl	KO-Zeus	OK	512.001	334.233	-0.615925	-5.47888	4.28018e-08	1.81489e-06	Significant	-1	312.178	0.112418	-1
FBgn0020908	Scp1	KO-Ctrl	KO-Zeus	OK	41.432	17.6349	-1.24827	-4.21282	2.52197e-05	0.000571439	Significant	-1	40.4098	0.296303	-1
FBgn0022700	Cht4	KO-Ctrl	KO-Zeus	OK	55.1423	30.0883	-0.883637	-3.32811	0.000874378	0.0109808	Significant	-1	94.9884	0.265507	-1
FBgn0023197	Jon74E	KO-Ctrl	KO-Zeus	OK	1478.27	39.1107	-5.22246	-29.3854	8.43489e-190	9.69253e-186	Significant	-1	1243.42	0.177723	-1
FBgn0023479	teq	KO-Ctrl	KO-Zeus	OK	299.645	114.104	-1.39871	-9.07452	1.14178e-19	1.4578e-17	Significant	-1	175.085	0.154135	-1
FBgn0023507	D2hgdh	KO-Ctrl	KO-Zeus	OK	808.782	1408.51	0.800581	9.01582	1.95394e-19	2.41427e-17	Significant	1	1053.2	0.0887973	1
FBgn0023550	FarO	KO-Ctrl	KO-Zeus	OK	40.1291	96.2727	1.25718	4.93158	8.15653e-07	2.661e-05	Significant	1	38.7188	0.254924	1
FBgn0024841	Pcd	KO-Ctrl	KO-Zeus	OK	110.993	220.016	1.00367	6.59094	4.37063e-11	2.68571e-09	Significant	1	208.452	0.15228	1
FBgn0024897	b6	KO-Ctrl	KO-Zeus	OK	29.1533	12.5637	-1.21293	-3.15531	0.00160328	0.0179214	Significant	-1	25.6715	0.384408	-1
FBgn0024943	PIP82	KO-Ctrl	KO-Zeus	OK	6.37064	29.4446	2.17617	4.75319	2.0023e-06	5.82491e-05	Significant	1	14.117	0.457833	1
FBgn0024975	CG2712	KO-Ctrl	KO-Zeus	OK	63.975	165.145	1.35789	6.96568	3.26827e-12	2.33265e-10	Significant	1	98.8804	0.19494	1
FBgn0024991	CG2694	KO-Ctrl	KO-Zeus	OK	172.333	548.294	1.66356	14.3015	2.14243e-46	2.05156e-43	Significant	1	347.335	0.116321	1
FBgn0024997	CG2681	KO-Ctrl	KO-Zeus	OK	96.8751	160.119	0.718878	3.78244	0.0001553	0.00264771	Significant	1	152.778	0.190057	1
FBgn0024998	CG2685	KO-Ctrl	KO-Zeus	OK	159.083	258.263	0.695991	4.86067	1.1699e-06	3.61379e-05	Significant	1	206.514	0.143188	1
FBgn0025583	IM2	KO-Ctrl	KO-Zeus	OK	42.0591	21.4083	-0.963319	-2.98964	0.00279307	0.0275421	Significant	-1	28.7421	0.322219	-1
FBgn0025687	LKRSDH	KO-Ctrl	KO-Zeus	OK	173.431	275.997	0.676982	4.0758	4.58558e-05	0.000954582	Significant	1	211.853	0.166098	1
FBgn0026263	bip1	KO-Ctrl	KO-Zeus	OK	206.791	123.83	-0.741455	-4.84039	1.29585e-06	3.8879e-05	Significant	-1	141.425	0.153181	-1
FBgn0026397	Or22b	KO-Ctrl	KO-Zeus	OK	51.8781	0.738965	-6.17912	-5.82352	5.76219e-09	2.78207e-07	Significant	-1	28.9008	1.06106	-1
FBgn0026872	CG14777	KO-Ctrl	KO-Zeus	OK	94.9839	148.165	0.652145	3.53256	0.00041156	0.00588214	Significant	1	125.107	0.18461	1
FBgn0027364	Six4	KO-Ctrl	KO-Zeus	OK	42.7752	74.0829	0.784926	3.04839	0.00230072	0.0237962	Significant	1	66.3941	0.257489	1
FBgn0027556	CG4928	KO-Ctrl	KO-Zeus	OK	2024.14	3430.79	0.759815	7.07617	1.48195e-12	1.08466e-10	Significant	1	2854.06	0.107377	1
FBgn0027578	CG14526	KO-Ctrl	KO-Zeus	OK	43.461	22.4467	-0.996147	-2.69505	0.00703772	0.0540939	Significant	-1	26.5518	0.36962	-1
FBgn0027584	CG4757	KO-Ctrl	KO-Zeus	OK	344.998	110.772	-1.64082	-10.3632	3.647e-25	6.44734e-23	Significant	-1	148.72	0.158332	-1
FBgn0028369	kirre	KO-Ctrl	KO-Zeus	OK	351.182	191.289	-0.881329	-7.79017	6.69211e-15	6.05505e-13	Significant	-1	276.859	0.113133	-1
FBgn0028400	Syt4	KO-Ctrl	KO-Zeus	OK	531.397	351.507	-0.601082	-5.64414	1.66012e-08	7.45172e-07	Significant	-1	300.584	0.106497	-1
FBgn0028426	JhI-1	KO-Ctrl	KO-Zeus	OK	95.7853	148.271	0.620436	3.6772	0.000235805	0.00371183	Significant	1	114.036	0.168725	1
FBgn0028481	CG4341	KO-Ctrl	KO-Zeus	OK	57.1929	32.3545	-0.828675	-3.28534	0.00101858	0.0125182	Significant	-1	56.9497	0.252234	-1
FBgn0028526	CG15293	KO-Ctrl	KO-Zeus	OK	229.407	77.4328	-1.56413	-7.3604	1.83364e-13	1.51586e-11	Significant	-1	93.9148	0.212507	-1
FBgn0028543	NimB2	KO-Ctrl	KO-Zeus	OK	163.349	86.381	-0.907074	-4.67985	2.8708e-06	8.04594e-05	Significant	-1	93.336	0.193825	-1
FBgn0028583	lcs	KO-Ctrl	KO-Zeus	OK	259.868	1127.72	2.11567	10.543	5.47478e-26	1.08467e-23	Significant	1	313.268	0.200672	1
FBgn0028675	Sur	KO-Ctrl	KO-Zeus	OK	48.7875	81.1922	0.72597	3.11601	0.00183318	0.0199669	Significant	1	67.6389	0.232981	1
FBgn0028699	Rh50	KO-Ctrl	KO-Zeus	OK	61.4238	100.917	0.704724	3.11842	0.00181825	0.0198607	Significant	1	64.0519	0.225988	1
FBgn0028853	CG15263	KO-Ctrl	KO-Zeus	OK	380.511	77.7508	-2.29906	-10.3439	4.45811e-25	7.76183e-23	Significant	-1	139.797	0.222261	-1
FBgn0028855	CG15282	KO-Ctrl	KO-Zeus	OK	39.3516	72.7817	0.892621	3.63009	0.000283325	0.00431217	Significant	1	39.9806	0.245895	1
FBgn0028872	CG18095	KO-Ctrl	KO-Zeus	OK	136.17	287.113	1.07587	6.86166	6.80626e-12	4.6554e-10	Significant	1	182.555	0.156795	1
FBgn0028936	NimB5	KO-Ctrl	KO-Zeus	OK	56.6634	33.6678	-0.753728	-2.59647	0.00941865	0.0666029	Significant	-1	34.2566	0.290289	-1
FBgn0028986	Spn38F	KO-Ctrl	KO-Zeus	OK	14495.5	9398.32	-0.624914	-6.6392	3.15395e-11	2.00232e-09	Significant	-1	12744.4	0.0941249	-1
FBgn0028987	Spn28F	KO-Ctrl	KO-Zeus	OK	17578.1	9264.78	-0.923721	-9.97097	2.04234e-23	3.21487e-21	Significant	-1	13212.8	0.0926411	-1
FBgn0029170	TwdlT	KO-Ctrl	KO-Zeus	OK	176.986	108.317	-0.717374	-4.62015	3.83454e-06	0.000104911	Significant	-1	112.732	0.155271	-1
FBgn0029518	CG13376	KO-Ctrl	KO-Zeus	OK	9.86948	20.3539	0.980387	2.45301	0.0141667	0.0882326	Significant	1	30.6078	0.399667	1
FBgn0029608	CG3091	KO-Ctrl	KO-Zeus	OK	265.979	176.264	-0.600478	-4.85052	1.2314e-06	3.7633e-05	Significant	-1	282.917	0.123797	-1
FBgn0029643	CG14420	KO-Ctrl	KO-Zeus	OK	3.78139	11.7906	1.60694	2.55293	0.0106822	0.0729345	Significant	1	8.94814	0.629451	1
FBgn0029708	CG3556	KO-Ctrl	KO-Zeus	OK	133.95	82.9447	-0.691108	-3.62791	0.00028572	0.00433832	Significant	-1	95.6634	0.190497	-1
FBgn0029768	SPR	KO-Ctrl	KO-Zeus	OK	139.519	49.0448	-1.50541	-8.10299	5.36254e-16	5.45318e-14	Significant	-1	92.578	0.185784	-1
FBgn0029798	CG4078	KO-Ctrl	KO-Zeus	OK	65.3804	155.647	1.24157	6.40197	1.5339e-10	9.03898e-09	Significant	1	89.3754	0.193935	1
FBgn0029804	CG3097	KO-Ctrl	KO-Zeus	OK	529.373	317.01	-0.736785	-7.39917	1.37036e-13	1.14107e-11	Significant	-1	446.575	0.0995766	-1
FBgn0029824	CG3726	KO-Ctrl	KO-Zeus	OK	78.4282	127.198	0.68973	3.80634	0.000141037	0.00245182	Significant	1	107.552	0.181205	1
FBgn0029896	CG3168	KO-Ctrl	KO-Zeus	OK	3594.47	7254.51	1.01203	9.80467	1.07497e-22	1.58365e-20	Significant	1	6157.75	0.103219	1
FBgn0029966	Ir7c	KO-Ctrl	KO-Zeus	OK	1.72258	55.5	5.10955	6.83017	8.48139e-12	5.69939e-10	Significant	1	41.9191	0.748085	1
FBgn0030001	cyr	KO-Ctrl	KO-Zeus	OK	12.9619	28.4765	1.1151	3.12137	0.00180014	0.0197192	Significant	1	26.3616	0.357248	1
FBgn0030008	CG2129	KO-Ctrl	KO-Zeus	OK	73.1398	117.539	0.678064	3.75341	0.000174443	0.00290511	Significant	1	98.3626	0.180653	1
FBgn0030063	CG1789	KO-Ctrl	KO-Zeus	OK	123.367	214.922	0.80852	4.92012	8.649e-07	2.79173e-05	Significant	1	171.856	0.164329	1
FBgn0030098	CG12057	KO-Ctrl	KO-Zeus	OK	216.492	494.369	1.19684	6.8363	8.1265e-12	5.52554e-10	Significant	1	1027.38	0.175072	1
FBgn0030103	Obp8a	KO-Ctrl	KO-Zeus	OK	277.618	141.774	-0.96652	-4.34402	1.39899e-05	0.000339868	Significant	-1	254.077	0.222494	-1
FBgn0030157	CG1468	KO-Ctrl	KO-Zeus	OK	103.771	34.6382	-1.56856	-4.92676	8.36051e-07	2.70621e-05	Significant	-1	39.2322	0.318376	-1
FBgn0030158	CG9686	KO-Ctrl	KO-Zeus	OK	4.14739	19.2368	2.13261	3.80876	0.000139666	0.00243906	Significant	1	10.6161	0.559923	1
FBgn0030262	Vago	KO-Ctrl	KO-Zeus	OK	21.7872	5.23322	-2.03407	-2.68766	0.00719547	0.054925	Significant	-1	9.77599	0.756819	-1
FBgn0030332	CG9360	KO-Ctrl	KO-Zeus	OK	143.876	31.4053	-2.11219	-10.1829	2.36487e-24	3.82742e-22	Significant	-1	379.934	0.207426	-1
FBgn0030420	CG12717	KO-Ctrl	KO-Zeus	OK	56.6006	117.261	1.04459	3.60965	0.000306606	0.00460283	Significant	1	66.7198	0.289387	1
FBgn0030452	MFS10	KO-Ctrl	KO-Zeus	OK	24.7804	43.6142	0.839935	2.60768	0.00911592	0.0650155	Significant	1	29.4086	0.322101	1
FBgn0030482	CG1673	KO-Ctrl	KO-Zeus	OK	112.214	187.527	0.72932	4.73602	2.17953e-06	6.32449e-05	Significant	1	127.619	0.153994	1
FBgn0030508	CG15760	KO-Ctrl	KO-Zeus	OK	19.0367	65.3882	1.78772	5.14639	2.65544e-07	9.56543e-06	Significant	1	27.5369	0.347374	1
FBgn0030524	CG10993	KO-Ctrl	KO-Zeus	OK	191.375	106.147	-0.844768	-4.71455	2.42245e-06	6.9591e-05	Significant	-1	165.059	0.179183	-1
FBgn0030525	CG10996	KO-Ctrl	KO-Zeus	OK	1009.19	503.453	-1.00113	-10.6179	2.45937e-26	5.04654e-24	Significant	-1	918.856	0.0942867	-1
FBgn0030528	CG11095	KO-Ctrl	KO-Zeus	OK	43.8865	27.4914	-0.668446	-2.53813	0.0111448	0.0750611	Significant	-1	37.1425	0.263362	-1
FBgn0030583	CG14410	KO-Ctrl	KO-Zeus	OK	17.3679	68.8323	1.97279	6.82318	8.90449e-12	5.94892e-10	Significant	1	74.9886	0.289131	1
FBgn0030593	CG9512	KO-Ctrl	KO-Zeus	OK	1437.73	2519.73	0.805849	10.8725	1.55885e-27	3.44477e-25	Significant	1	2186.9	0.0741181	1
FBgn0030594	CG9509	KO-Ctrl	KO-Zeus	OK	1290.92	2270.29	0.812659	10.2626	1.03838e-24	1.75471e-22	Significant	1	1959.75	0.0791862	1
FBgn0030688	CG8952	KO-Ctrl	KO-Zeus	OK	274.332	174.36	-0.647361	-3.57736	0.000347078	0.00509358	Significant	-1	272.84	0.18096	-1
FBgn0030737	CG9914	KO-Ctrl	KO-Zeus	OK	1559.3	2544.71	0.707566	8.64734	5.2713e-18	5.99727e-16	Significant	1	2111.82	0.0818246	1
FBgn0030798	CG13003	KO-Ctrl	KO-Zeus	OK	18.3825	50.0753	1.45477	4.95828	7.11215e-07	2.34844e-05	Significant	1	63.1776	0.293402	1
FBgn0030837	CG8661	KO-Ctrl	KO-Zeus	OK	176.815	87.6018	-0.986197	-5.92422	3.13787e-09	1.56771e-07	Significant	-1	249.604	0.166469	-1
FBgn0030895	CG7135	KO-Ctrl	KO-Zeus	OK	79.6855	51.4497	-0.646478	-2.84144	0.00449097	0.0396967	Significant	-1	46.1916	0.227518	-1
FBgn0030914	CG6106	KO-Ctrl	KO-Zeus	OK	3.0172	42.1442	3.87249	5.62724	1.83121e-08	8.15598e-07	Significant	1	8.08807	0.688169	1
FBgn0030929	CG15043	KO-Ctrl	KO-Zeus	OK	121.455	41.6552	-1.52741	-7.33044	2.2939e-13	1.8433e-11	Significant	-1	127.34	0.208365	-1
FBgn0030998	CG14195	KO-Ctrl	KO-Zeus	OK	119.936	181.878	0.610764	3.6519	0.000260305	0.00401498	Significant	1	162.195	0.167245	1
FBgn0030999	Mur18B	KO-Ctrl	KO-Zeus	OK	15966.6	27560.1	0.787458	11.0241	2.92469e-28	6.72153e-26	Significant	1	21575.7	0.0714307	1
FBgn0031010	CG8028	KO-Ctrl	KO-Zeus	OK	129.934	287.916	1.13428	7.34397	2.07347e-13	1.6898e-11	Significant	1	224.178	0.154451	1
FBgn0031176	whe	KO-Ctrl	KO-Zeus	OK	440.49	925.319	1.07068	6.68283	2.34377e-11	1.49624e-09	Significant	1	397.28	0.160214	1
FBgn0031248	CG11912	KO-Ctrl	KO-Zeus	OK	70.492	140.344	1.00779	5.80386	6.48072e-09	3.10292e-07	Significant	1	179.649	0.173641	1
FBgn0031249	CG11911	KO-Ctrl	KO-Zeus	OK	253.071	653.253	1.37231	11.882	1.46773e-32	4.81875e-30	Significant	1	996.438	0.115494	1
FBgn0031294	IA-2	KO-Ctrl	KO-Zeus	OK	672.369	1182.74	0.809733	7.85724	3.92687e-15	3.69866e-13	Significant	1	1084.76	0.103056	1
FBgn0031305	Iris	KO-Ctrl	KO-Zeus	OK	78.1539	28.9425	-1.43877	-5.44383	5.21469e-08	2.18192e-06	Significant	-1	34.2825	0.264293	-1
FBgn0031306	CG4577	KO-Ctrl	KO-Zeus	OK	38.2264	21.8469	-0.81525	-2.67796	0.00740731	0.0560352	Significant	-1	30.3476	0.30443	-1
FBgn0031307	MFS3	KO-Ctrl	KO-Zeus	OK	24.4062	53.603	1.14611	3.37833	0.000729275	0.00938422	Significant	1	31.6882	0.339255	1
FBgn0031351	CG14352	KO-Ctrl	KO-Zeus	OK	79.1791	36.6969	-1.09425	-4.31626	1.58693e-05	0.000382294	Significant	-1	90.4598	0.253519	-1
FBgn0031389	CG4259	KO-Ctrl	KO-Zeus	OK	29.0353	55.439	0.954262	3.51577	0.000438478	0.00620511	Significant	1	44.1218	0.271423	1
FBgn0031412	CG16995	KO-Ctrl	KO-Zeus	OK	56.3535	27.2438	-1.00944	-2.84959	0.00437752	0.0391152	Significant	-1	43.847	0.35424	-1
FBgn0031430	CG3528	KO-Ctrl	KO-Zeus	OK	487.759	231.233	-1.06498	-6.75934	1.38618e-11	9.10207e-10	Significant	-1	781.861	0.157557	-1
FBgn0031432	Cyp309a1	KO-Ctrl	KO-Zeus	OK	114.76	58.0534	-0.972163	-4.78903	1.67591e-06	4.96338e-05	Significant	-1	88.3934	0.202998	-1
FBgn0031517	CG15406	KO-Ctrl	KO-Zeus	OK	1302.76	2723.37	1.06377	17.6379	1.26083e-69	2.4147e-66	Significant	1	1986.41	0.0603115	1
FBgn0031520	CG8837	KO-Ctrl	KO-Zeus	OK	77.2764	220.464	1.50025	9.55013	1.29539e-21	1.81529e-19	Significant	1	217.598	0.157092	1
FBgn0031522	CG3285	KO-Ctrl	KO-Zeus	OK	309.547	637.446	1.04289	10.3757	3.19707e-25	5.74025e-23	Significant	1	420.973	0.100513	1
FBgn0031523	CG15408	KO-Ctrl	KO-Zeus	OK	435.603	736.054	0.752686	8.19684	2.46798e-16	2.53211e-14	Significant	1	520.007	0.0918264	1
FBgn0031547	Sr-CIV	KO-Ctrl	KO-Zeus	OK	54.569	88.7181	0.706067	3.47489	0.000511063	0.00699459	Significant	1	59.494	0.203191	1
FBgn0031558	CG16704	KO-Ctrl	KO-Zeus	OK	20.8238	6.66575	-1.56393	-3.36969	0.000752528	0.00964024	Significant	-1	17.8771	0.464118	-1
FBgn0031632	CG15628	KO-Ctrl	KO-Zeus	OK	44.4574	23.0084	-0.940286	-3.13083	0.00174312	0.0192784	Significant	-1	35.6092	0.300331	-1
FBgn0031653	Jon25Biii	KO-Ctrl	KO-Zeus	OK	736.074	1754.5	1.25524	7.34507	2.05653e-13	1.68797e-11	Significant	1	2794.35	0.170896	1
FBgn0031654	Jon25Bii	KO-Ctrl	KO-Zeus	OK	280.489	140.261	-0.995603	-5.01808	5.21902e-07	1.76908e-05	Significant	-1	239.978	0.198403	-1
FBgn0031689	Cyp28d1	KO-Ctrl	KO-Zeus	OK	245.912	131.669	-0.888516	-6.05659	1.39034e-09	7.22913e-08	Significant	-1	187.876	0.146702	-1
FBgn0031701	TotM	KO-Ctrl	KO-Zeus	OK	26.161	12.7469	-1.00851	-2.72904	0.00635182	0.05046	Significant	-1	31.4329	0.369547	-1
FBgn0031726	Cyp6a16	KO-Ctrl	KO-Zeus	OK	43.2381	76.6788	0.834273	3.76199	0.000168565	0.00281947	Significant	1	53.1393	0.221764	1
FBgn0031746	CG9029	KO-Ctrl	KO-Zeus	OK	20975.3	12937.2	-0.697021	-10.5225	6.80454e-26	1.30318e-23	Significant	-1	17415.3	0.066241	-1
FBgn0031834	CG13766	KO-Ctrl	KO-Zeus	OK	52.943	94.7014	0.827004	3.51516	0.000439483	0.00620648	Significant	1	65.4666	0.235268	1
FBgn0031865	Nha1	KO-Ctrl	KO-Zeus	OK	173.848	441.227	1.33724	11.4164	3.46475e-30	9.0485e-28	Significant	1	305.609	0.117134	1
FBgn0031925	Cyp4d21	KO-Ctrl	KO-Zeus	OK	10.8948	1.60196	-2.6466	-3.04157	0.00235345	0.0241891	Significant	-1	8.06259	0.870141	-1
FBgn0031937	CG13795	KO-Ctrl	KO-Zeus	OK	43.8056	20.556	-1.07621	-3.0255	0.00248222	0.0252417	Significant	-1	17.4805	0.355713	-1
FBgn0031940	CG7214	KO-Ctrl	KO-Zeus	OK	0.855915	7.46383	3.20582	2.92727	0.00341954	0.032261	Significant	1	25.1435	1.09516	1
FBgn0032008	CG14277	KO-Ctrl	KO-Zeus	OK	205.242	127.922	-0.677625	-3.81338	0.000137078	0.0023975	Significant	-1	161.23	0.177697	-1
FBgn0032021	CG7781	KO-Ctrl	KO-Zeus	OK	21.7549	51.0506	1.23327	3.01687	0.00255399	0.0257009	Significant	1	26.8076	0.408791	1
FBgn0032022	CG14275	KO-Ctrl	KO-Zeus	OK	47.3103	82.4928	0.82043	3.88748	0.000101291	0.0018895	Significant	1	60.9664	0.211044	1
FBgn0032049	Bace	KO-Ctrl	KO-Zeus	OK	3172.62	1252.69	-1.33965	-9.02199	1.84706e-19	2.30702e-17	Significant	-1	2376.13	0.148487	-1
FBgn0032067	LManIV	KO-Ctrl	KO-Zeus	OK	8.37576	20.0656	1.27151	2.98643	0.00282256	0.0277689	Significant	1	22.5763	0.425763	1
FBgn0032068	LManV	KO-Ctrl	KO-Zeus	OK	490.465	798.36	0.700482	6.37594	1.81839e-10	1.04476e-08	Significant	1	1416.14	0.109863	1
FBgn0032069	LManVI	KO-Ctrl	KO-Zeus	OK	625.772	1083.54	0.791918	7.82865	4.93119e-15	4.56971e-13	Significant	1	2008.58	0.101156	1
FBgn0032082	CG18088	KO-Ctrl	KO-Zeus	OK	1.71183	7.79593	2.26558	2.64423	0.00818766	0.0602719	Significant	1	8.30551	0.8568	1
FBgn0032147	IP3K1	KO-Ctrl	KO-Zeus	OK	168.443	261.089	0.622934	4.36707	1.25925e-05	0.000308529	Significant	1	231.105	0.142643	1
FBgn0032178	Spn31A	KO-Ctrl	KO-Zeus	OK	29.8292	50.5148	0.771588	2.70808	0.00676738	0.0527929	Significant	1	31.7544	0.284921	1
FBgn0032260	CG13144	KO-Ctrl	KO-Zeus	OK	5.69238	0.357021	-3.87009	-2.99947	0.00270446	0.0269167	Significant	-1	7.35015	1.29026	-1
FBgn0032283	CG7296	KO-Ctrl	KO-Zeus	OK	14.7869	4.73363	-1.48345	-2.93622	0.00332236	0.0315254	Significant	-1	18.6566	0.505225	-1
FBgn0032337	AstCC	KO-Ctrl	KO-Zeus	OK	75.1607	0.887918	-6.15041	-7.11486	1.12029e-12	8.4139e-11	Significant	-1	93.6594	0.864445	-1
FBgn0032354	CG4788	KO-Ctrl	KO-Zeus	OK	175.377	266.072	0.604974	4.27924	1.87531e-05	0.000441581	Significant	1	224.279	0.141374	1
FBgn0032381	Mal-B1	KO-Ctrl	KO-Zeus	OK	221.552	375.025	0.761234	5.02679	4.9877e-07	1.70576e-05	Significant	1	152.951	0.151436	1
FBgn0032387	CG16965	KO-Ctrl	KO-Zeus	OK	108.026	71.5994	-0.605926	-3.27473	0.00105761	0.0128468	Significant	-1	95.3617	0.185031	-1
FBgn0032415	rho-6	KO-Ctrl	KO-Zeus	OK	104.037	66.5196	-0.648898	-3.5282	0.000418402	0.0059725	Significant	-1	186.633	0.183918	-1
FBgn0032472	CG9928	KO-Ctrl	KO-Zeus	OK	64.5732	38.9304	-0.729802	-2.84615	0.00442507	0.0393564	Significant	-1	43.0892	0.256417	-1
FBgn0032494	CG5945	KO-Ctrl	KO-Zeus	OK	82.0915	49.5147	-0.728428	-3.00711	0.00263743	0.0263766	Significant	-1	94.2251	0.242235	-1
FBgn0032495	CG16820	KO-Ctrl	KO-Zeus	OK	51.0322	154.317	1.58833	7.1808	6.93044e-13	5.45463e-11	Significant	1	84.234	0.221191	1
FBgn0032505	CG16826	KO-Ctrl	KO-Zeus	OK	763.645	2590.96	1.76096	10.6106	2.66082e-26	5.36412e-24	Significant	1	847.993	0.165963	1
FBgn0032669	CG15155	KO-Ctrl	KO-Zeus	OK	780.8	1243.98	0.670228	6.9025	5.10964e-12	3.62438e-10	Significant	1	814.061	0.0970993	1
FBgn0032684	CG10178	KO-Ctrl	KO-Zeus	OK	123.316	202.268	0.708412	5.15189	2.57873e-07	9.34771e-06	Significant	1	169.223	0.137505	1
FBgn0032706	Irk3	KO-Ctrl	KO-Zeus	OK	335.238	721.193	1.09758	9.00727	2.11254e-19	2.58246e-17	Significant	1	535.03	0.121854	1
FBgn0032834	CG13965	KO-Ctrl	KO-Zeus	OK	1286.86	820.698	-0.646316	-4.70511	2.53735e-06	7.21699e-05	Significant	-1	955.203	0.137365	-1
FBgn0032835	CG16772	KO-Ctrl	KO-Zeus	OK	1440.14	549.752	-1.38884	-11.7658	5.85936e-32	1.81973e-29	Significant	-1	766.559	0.118041	-1
FBgn0032836	CG10680	KO-Ctrl	KO-Zeus	OK	212.23	79.7284	-1.40322	-7.71552	1.20488e-14	1.06502e-12	Significant	-1	97.3018	0.181869	-1
FBgn0032839	CG10659	KO-Ctrl	KO-Zeus	OK	151.552	67.0893	-1.16598	-4.85902	1.17966e-06	3.63418e-05	Significant	-1	93.6256	0.239961	-1
FBgn0032868	CG17472	KO-Ctrl	KO-Zeus	OK	3864.28	2478.67	-0.639495	-4.2707	1.94858e-05	0.000456962	Significant	-1	3120.88	0.14974	-1
FBgn0032895	twit	KO-Ctrl	KO-Zeus	OK	28.1363	48.6971	0.782055	2.80317	0.00506025	0.0433289	Significant	1	50.1359	0.278989	1
FBgn0032908	CG9270	KO-Ctrl	KO-Zeus	OK	73.7182	126.413	0.761459	3.83192	0.000127148	0.00227934	Significant	1	118.778	0.198715	1
FBgn0032913	CG9259	KO-Ctrl	KO-Zeus	OK	1038.81	2417.99	1.21963	11.757	6.50354e-32	1.96664e-29	Significant	1	1337.27	0.103737	1
FBgn0032946	nrv3	KO-Ctrl	KO-Zeus	OK	51.1915	148.053	1.52622	6.70131	2.06559e-11	1.32602e-09	Significant	1	82.0322	0.22775	1
FBgn0033047	CG7882	KO-Ctrl	KO-Zeus	OK	818.911	1432.59	0.807537	10.6251	2.27677e-26	4.75679e-24	Significant	1	1174.79	0.0760025	1
FBgn0033093	CG3270	KO-Ctrl	KO-Zeus	OK	944.243	1570.47	0.733236	8.24689	1.62573e-16	1.71387e-14	Significant	1	1142.9	0.0889107	1
FBgn0033115	Spn42De	KO-Ctrl	KO-Zeus	OK	153.98	94.6247	-0.701842	-4.2504	2.1339e-05	0.000493741	Significant	-1	98.7546	0.165124	-1
FBgn0033170	sPLA2	KO-Ctrl	KO-Zeus	OK	17.5778	6.34292	-1.45269	-2.76097	0.00576303	0.0473021	Significant	-1	9.2451	0.526152	-1
FBgn0033216	CG1946	KO-Ctrl	KO-Zeus	OK	87.1874	43.3904	-0.986247	-3.98377	6.783e-05	0.00134385	Significant	-1	69.6609	0.247566	-1
FBgn0033250	CG14762	KO-Ctrl	KO-Zeus	OK	33.1826	13.436	-1.30331	-3.58455	0.000337663	0.00499368	Significant	-1	19.065	0.363593	-1
FBgn0033296	Mal-A7	KO-Ctrl	KO-Zeus	OK	2526.22	1427.32	-0.823144	-10.1887	2.22733e-24	3.65632e-22	Significant	-1	1723.84	0.0807899	-1
FBgn0033297	Mal-A8	KO-Ctrl	KO-Zeus	OK	1315.97	625.958	-1.06826	-12.2247	2.29497e-34	9.41838e-32	Significant	-1	927.846	0.0873855	-1
FBgn0033307	CG14752	KO-Ctrl	KO-Zeus	OK	28.1256	11.9948	-1.24573	-3.39303	0.00069123	0.00897506	Significant	-1	25.4969	0.367142	-1
FBgn0033327	PGRP-SC1b	KO-Ctrl	KO-Zeus	OK	5.03308	15.8195	1.74141	3.2313	0.0012323	0.0146587	Significant	1	17.9013	0.538921	1
FBgn0033366	Ance-4	KO-Ctrl	KO-Zeus	OK	53.4843	15.1626	-1.80472	-5.43666	5.42876e-08	2.25205e-06	Significant	-1	22.4803	0.331954	-1
FBgn0033668	exp	KO-Ctrl	KO-Zeus	OK	34.3401	18.6318	-0.898554	-2.75248	0.00591466	0.0480548	Significant	-1	28.5142	0.326453	-1
FBgn0033685	OSCP1	KO-Ctrl	KO-Zeus	OK	8.54267	0	-5.41659	-4.35239	1.34662e-05	0.000328535	Significant	-1	17.0461	1.24451	-1
FBgn0033725	Cpr49Ac	KO-Ctrl	KO-Zeus	OK	33.9038	16.6629	-1.03765	-3.04618	0.00231766	0.0239283	Significant	-1	22.3773	0.340638	-1
FBgn0033728	Cpr49Ae	KO-Ctrl	KO-Zeus	OK	41.1064	8.85579	-2.21927	-5.91436	3.33165e-09	1.65731e-07	Significant	-1	28.1539	0.375235	-1
FBgn0033753	Cyp301a1	KO-Ctrl	KO-Zeus	OK	8.14696	23.0039	1.50151	3.08623	0.00202712	0.0215682	Significant	1	18.0297	0.486519	1
FBgn0033760	CG8785	KO-Ctrl	KO-Zeus	OK	62.3606	95.2974	0.600142	3.1364	0.00171033	0.0189339	Significant	1	90.629	0.191347	1
FBgn0033774	CG12374	KO-Ctrl	KO-Zeus	OK	2335.15	162.818	-3.84097	-20.2084	8.26548e-91	1.89957e-87	Significant	-1	5425.63	0.190068	-1
FBgn0033782	sug	KO-Ctrl	KO-Zeus	OK	119.158	66.0443	-0.848158	-4.71021	2.47457e-06	7.07345e-05	Significant	-1	126.899	0.180068	-1
FBgn0033788	CG13323	KO-Ctrl	KO-Zeus	OK	1177.99	544.055	-1.10814	-11.4596	2.10431e-30	5.75728e-28	Significant	-1	887.474	0.0966993	-1
FBgn0033789	CG13324	KO-Ctrl	KO-Zeus	OK	46.2255	11.7046	-1.90723	-5.75975	8.42388e-09	4.01655e-07	Significant	-1	54.8437	0.331131	-1
FBgn0033792	CG13325	KO-Ctrl	KO-Zeus	OK	264.954	17.4	-3.94819	-14.9854	9.15278e-51	1.16861e-47	Significant	-1	84.6427	0.26347	-1
FBgn0033798	CG15870	KO-Ctrl	KO-Zeus	OK	18.6006	43.9868	1.25941	4.36993	1.24289e-05	0.000306481	Significant	1	45.7672	0.288199	1
FBgn0033820	CG4716	KO-Ctrl	KO-Zeus	OK	385.828	121.648	-1.68256	-13.5732	5.77643e-42	3.39318e-39	Significant	-1	251.507	0.123962	-1
FBgn0033887	St4	KO-Ctrl	KO-Zeus	OK	78.7007	118.038	0.596729	3.38543	0.000710661	0.00919618	Significant	1	121.18	0.176264	1
FBgn0033913	CG8468	KO-Ctrl	KO-Zeus	OK	234.238	371.217	0.656595	5.23579	1.64277e-07	6.20907e-06	Significant	1	352.316	0.125405	1
FBgn0034008	CG8152	KO-Ctrl	KO-Zeus	OK	297.38	131.372	-1.17466	-7.52402	5.31175e-14	4.55503e-12	Significant	-1	255.081	0.156121	-1
FBgn0034140	Lst	KO-Ctrl	KO-Zeus	OK	143.72	88.0763	-0.709749	-4.26475	2.00125e-05	0.000467405	Significant	-1	124.922	0.166422	-1
FBgn0034152	Acp53C14a	KO-Ctrl	KO-Zeus	OK	17824.5	11382.4	-0.646955	-2.5216	0.0116821	0.0772588	Significant	-1	16449	0.256565	-1
FBgn0034153	Acp53C14b	KO-Ctrl	KO-Zeus	OK	18879.7	12266.5	-0.621853	-5.48019	4.24867e-08	1.8082e-06	Significant	-1	16731.3	0.113473	-1
FBgn0034229	CG4847	KO-Ctrl	KO-Zeus	OK	5529.61	2152.31	-1.36007	-13.2367	5.38362e-40	2.81196e-37	Significant	-1	7809.9	0.10275	-1
FBgn0034247	CG6484	KO-Ctrl	KO-Zeus	OK	675.141	292.215	-1.20352	-12.2698	1.31595e-34	5.60057e-32	Significant	-1	640.1	0.0980883	-1
FBgn0034289	CG10910	KO-Ctrl	KO-Zeus	OK	144.221	74.7218	-0.950985	-6.01231	1.82898e-09	9.42455e-08	Significant	-1	165.299	0.158173	-1
FBgn0034290	CG5773	KO-Ctrl	KO-Zeus	OK	260.556	160.332	-0.693848	-4.15827	3.20673e-05	0.000705911	Significant	-1	187.681	0.16686	-1
FBgn0034317	CG14499	KO-Ctrl	KO-Zeus	OK	27.7868	9.06386	-1.61692	-4.05503	5.01279e-05	0.00102677	Significant	-1	29.962	0.398745	-1
FBgn0034331	CG15067	KO-Ctrl	KO-Zeus	OK	85.0419	44.2467	-0.923475	-3.44655	0.0005678	0.00763909	Significant	-1	49.6094	0.267942	-1
FBgn0034407	DptB	KO-Ctrl	KO-Zeus	OK	37.0451	5.12678	-2.74388	-4.96104	7.01184e-07	2.3287e-05	Significant	-1	10.5587	0.553086	-1
FBgn0034408	sano	KO-Ctrl	KO-Zeus	OK	129.097	83.8646	-0.626643	-2.9094	0.00362127	0.0337473	Significant	-1	117.344	0.215386	-1
FBgn0034470	Obp56d	KO-Ctrl	KO-Zeus	OK	171.659	950.751	2.47316	13.7214	7.56021e-43	4.82635e-40	Significant	1	352.047	0.180242	1
FBgn0034471	Obp56e	KO-Ctrl	KO-Zeus	OK	541.627	137.667	-1.97115	-6.45753	1.06427e-10	6.33656e-09	Significant	-1	386.406	0.305249	-1
FBgn0034474	Obp56g	KO-Ctrl	KO-Zeus	OK	359.405	808.173	1.16612	7.99798	1.26477e-15	1.24218e-13	Significant	1	724.618	0.145801	1
FBgn0034511	GNBP-like3	KO-Ctrl	KO-Zeus	OK	73.8397	25.6296	-1.52042	-5.94788	2.7163e-09	1.38111e-07	Significant	-1	31.4436	0.255624	-1
FBgn0034515	CG13428	KO-Ctrl	KO-Zeus	OK	20.4495	3.85498	-2.39406	-4.56141	5.08103e-06	0.000134221	Significant	-1	25.736	0.524851	-1
FBgn0034552	CG17999	KO-Ctrl	KO-Zeus	OK	11.6351	29.2253	1.31188	3.27739	0.00104771	0.0127917	Significant	1	25.1571	0.400281	1
FBgn0034553	CG9993	KO-Ctrl	KO-Zeus	OK	24.4408	96.2809	1.9471	6.86398	6.69699e-12	4.60809e-10	Significant	1	60.6057	0.28367	1
FBgn0034612	CG10505	KO-Ctrl	KO-Zeus	OK	80.3284	125.418	0.6253	3.37049	0.000750333	0.00963361	Significant	1	99.1797	0.185522	1
FBgn0034623	CG9822	KO-Ctrl	KO-Zeus	OK	3.22704	0	-4.02127	-2.99496	0.00274484	0.0271822	Significant	-1	6.9922	1.34268	-1
FBgn0034663	CG4363	KO-Ctrl	KO-Zeus	OK	541.385	216.743	-1.3104	-9.87768	5.20255e-23	7.86611e-21	Significant	-1	743.988	0.132663	-1
FBgn0034664	CG4377	KO-Ctrl	KO-Zeus	OK	562.977	255.231	-1.1388	-6.90047	5.18312e-12	3.65394e-10	Significant	-1	394.8	0.165032	-1
FBgn0034715	Oatp58Db	KO-Ctrl	KO-Zeus	OK	256.08	676.468	1.40128	10.6666	1.45835e-26	3.10332e-24	Significant	1	461.314	0.131371	1
FBgn0034716	Oatp58Dc	KO-Ctrl	KO-Zeus	OK	800.275	1398.5	0.799848	8.28676	1.16374e-16	1.2382e-14	Significant	1	1152.57	0.0965211	1
FBgn0034733	CG4752	KO-Ctrl	KO-Zeus	OK	568.16	935.404	0.712975	6.63239	3.30292e-11	2.08011e-09	Significant	1	838.154	0.107499	1
FBgn0034737	CG11362	KO-Ctrl	KO-Zeus	OK	374.854	169.464	-1.14346	-5.24499	1.56289e-07	5.94986e-06	Significant	-1	544.739	0.218009	-1
FBgn0034768	Obp58b	KO-Ctrl	KO-Zeus	OK	36.741	15.5269	-1.26254	-3.38615	0.000708804	0.00918249	Significant	-1	18.4677	0.372854	-1
FBgn0034789	PIP5K59B	KO-Ctrl	KO-Zeus	OK	22.8554	2.48601	-3.41777	-5.10707	3.272e-07	1.15688e-05	Significant	-1	22.6193	0.669224	-1
FBgn0034887	St1	KO-Ctrl	KO-Zeus	OK	52.8168	31.1003	-0.749928	-2.74769	0.00600161	0.0483989	Significant	-1	36.2928	0.27293	-1
FBgn0035086	CG12851	KO-Ctrl	KO-Zeus	OK	219.268	349.616	0.665848	3.7402	0.000183874	0.00304015	Significant	1	356.01	0.178025	1
FBgn0035176	CG13905	KO-Ctrl	KO-Zeus	OK	252.268	469.302	0.887935	8.74287	2.27271e-18	2.66486e-16	Significant	1	440.011	0.101561	1
FBgn0035186	CG13912	KO-Ctrl	KO-Zeus	OK	21.4856	9.10192	-1.23296	-2.91234	0.00358732	0.0335137	Significant	-1	16.7539	0.423358	-1
FBgn0035189	CG9119	KO-Ctrl	KO-Zeus	OK	621.16	949.778	0.615082	6.20508	5.46677e-10	3.00568e-08	Significant	1	754.555	0.0991256	1
FBgn0035208	CG9184	KO-Ctrl	KO-Zeus	OK	33.7023	74.8097	1.15698	4.46195	8.12158e-06	0.000205562	Significant	1	53.1324	0.259298	1
FBgn0035294	Mfap1	KO-Ctrl	KO-Zeus	OK	214.598	371.102	0.783659	7.12119	1.07001e-12	8.14273e-11	Significant	1	315.342	0.110046	1
FBgn0035343	CG16762	KO-Ctrl	KO-Zeus	OK	103.154	246.91	1.25256	6.75121	1.46614e-11	9.51829e-10	Significant	1	178.286	0.185531	1
FBgn0035344	Cyp4d20	KO-Ctrl	KO-Zeus	OK	0.427957	9.457	4.42002	3.54141	0.000397991	0.00573097	Significant	1	12.5181	1.24809	1
FBgn0035358	CG14949	KO-Ctrl	KO-Zeus	OK	29.6837	147.335	2.3034	9.28415	1.63008e-20	2.17805e-18	Significant	1	60.9891	0.2481	1
FBgn0035430	CG12009	KO-Ctrl	KO-Zeus	OK	203.268	112.075	-0.86147	-5.55455	2.78327e-08	1.22071e-06	Significant	-1	175.96	0.155093	-1
FBgn0035476	CG12766	KO-Ctrl	KO-Zeus	OK	131.668	75.6903	-0.782497	-4.78939	1.6729e-06	4.96338e-05	Significant	-1	112.175	0.163381	-1
FBgn0035477	CG14982	KO-Ctrl	KO-Zeus	OK	49.1616	127.3	1.35391	5.84906	4.94364e-09	2.42767e-07	Significant	1	96.3368	0.231474	1
FBgn0035557	CG11353	KO-Ctrl	KO-Zeus	OK	40.8643	69.7669	0.764865	3.42089	0.000624172	0.00825358	Significant	1	53.1464	0.223587	1
FBgn0035666	Jon65Aii	KO-Ctrl	KO-Zeus	OK	143.798	221.4	0.625742	3.85796	0.000114337	0.00209545	Significant	1	302.283	0.162195	1
FBgn0035667	Jon65Ai	KO-Ctrl	KO-Zeus	OK	225.672	383.923	0.767791	5.01356	5.34325e-07	1.80586e-05	Significant	1	477.777	0.153143	1
FBgn0035670	CG10472	KO-Ctrl	KO-Zeus	OK	1975.69	3026.77	0.616861	5.63605	1.73995e-08	7.77969e-07	Significant	1	4334.57	0.109449	1
FBgn0035678	CG10469	KO-Ctrl	KO-Zeus	OK	24.9175	44.947	0.880001	3.20527	0.00134935	0.0157255	Significant	1	36.9451	0.274548	1
FBgn0035711	CG8519	KO-Ctrl	KO-Zeus	OK	79.7773	171.384	1.10702	5.64623	1.64003e-08	7.44887e-07	Significant	1	90.9117	0.196063	1
FBgn0035737	Cpr65Ec	KO-Ctrl	KO-Zeus	OK	108.576	53.5147	-1.01885	-4.46513	8.00191e-06	0.000203429	Significant	-1	87.0658	0.228179	-1
FBgn0035750	CG14826	KO-Ctrl	KO-Zeus	OK	137.42	86.6942	-0.662173	-3.59458	0.00032491	0.00482332	Significant	-1	151.79	0.184214	-1
FBgn0035815	Snmp2	KO-Ctrl	KO-Zeus	OK	28.8361	92.9984	1.69422	6.86834	6.49539e-12	4.52355e-10	Significant	1	69.9033	0.246672	1
FBgn0035861	CG7213	KO-Ctrl	KO-Zeus	OK	86.3521	136.14	0.646953	3.50821	0.000451136	0.00634516	Significant	1	140.772	0.184411	1
FBgn0035875	Cpr66Cb	KO-Ctrl	KO-Zeus	OK	30.3785	141.87	2.22855	10.5411	5.58161e-26	1.08709e-23	Significant	1	157.195	0.211414	1
FBgn0035886	Jon66Ci	KO-Ctrl	KO-Zeus	OK	4.9306	33.2638	2.70827	5.68062	1.34211e-08	6.19363e-07	Significant	1	50.2515	0.476757	1
FBgn0035914	CG6282	KO-Ctrl	KO-Zeus	OK	146.32	84.4317	-0.772242	-4.10297	4.07884e-05	0.000861579	Significant	-1	84.2584	0.188216	-1
FBgn0035929	CG13311	KO-Ctrl	KO-Zeus	OK	64.4229	143.535	1.17557	4.58832	4.46817e-06	0.000121654	Significant	1	94.8436	0.25621	1
FBgn0035968	Slc45-1	KO-Ctrl	KO-Zeus	OK	214.433	352.32	0.711459	6.39023	1.65635e-10	9.66147e-09	Significant	1	276.273	0.111335	1
FBgn0035982	CG4461	KO-Ctrl	KO-Zeus	OK	19.6879	7.58593	-1.38016	-2.76795	0.00564095	0.0465328	Significant	-1	14.0552	0.49862	-1
FBgn0036023	CG18179	KO-Ctrl	KO-Zeus	OK	53.2101	19.777	-1.42444	-4.30537	1.66708e-05	0.000399092	Significant	-1	65.3588	0.330853	-1
FBgn0036024	CG18180	KO-Ctrl	KO-Zeus	OK	3250.89	1238.89	-1.39077	-8.099	5.5411e-16	5.58533e-14	Significant	-1	2162.24	0.171721	-1
FBgn0036110	Cpr67Fb	KO-Ctrl	KO-Zeus	OK	69.6625	137.135	0.982303	3.65232	0.000259879	0.00401381	Significant	1	73.9392	0.268953	1
FBgn0036124	CG7839	KO-Ctrl	KO-Zeus	OK	255.418	391.652	0.617155	4.88352	1.04206e-06	3.31699e-05	Significant	1	313.159	0.126375	1
FBgn0036143	CG14142	KO-Ctrl	KO-Zeus	OK	139.641	70.652	-0.977637	-4.29335	1.75998e-05	0.000416989	Significant	-1	84.3821	0.22771	-1
FBgn0036178	CG14137	KO-Ctrl	KO-Zeus	OK	0.427957	43.6615	6.6543	5.54554	2.93056e-08	1.28042e-06	Significant	1	28.475	1.19994	1
FBgn0036179	CG7368	KO-Ctrl	KO-Zeus	OK	4.91992	46.7783	3.2407	6.52101	6.98366e-11	4.20153e-09	Significant	1	32.2631	0.496963	1
FBgn0036262	CG6910	KO-Ctrl	KO-Zeus	OK	520.3	331.936	-0.645834	-3.25215	0.00114536	0.0137383	Significant	-1	326.936	0.198587	-1
FBgn0036287	CG10663	KO-Ctrl	KO-Zeus	OK	18.5923	35.1687	0.873503	2.80047	0.00510289	0.0435046	Significant	1	32.3948	0.311914	1
FBgn0036289	CG10657	KO-Ctrl	KO-Zeus	OK	31.4063	73.8825	1.23653	4.59468	4.33414e-06	0.000118298	Significant	1	70.4004	0.269122	1
FBgn0036321	CG14120	KO-Ctrl	KO-Zeus	OK	243.288	469.885	0.941628	6.14684	7.90429e-10	4.28435e-08	Significant	1	592.677	0.153189	1
FBgn0036381	CG8745	KO-Ctrl	KO-Zeus	OK	175.996	432.8	1.29595	11.9578	5.91391e-33	2.12365e-30	Significant	1	328.019	0.108377	1
FBgn0036419	CG13482	KO-Ctrl	KO-Zeus	OK	290.347	120.359	-1.27672	-9.95715	2.34683e-23	3.64425e-21	Significant	-1	242.637	0.128222	-1
FBgn0036436	CG4914	KO-Ctrl	KO-Zeus	OK	2.79909	10.8988	1.93236	2.77199	0.0055715	0.0460591	Significant	1	9.43659	0.697102	1
FBgn0036485	FucTA	KO-Ctrl	KO-Zeus	OK	268.61	426.395	0.659703	4.90873	9.1667e-07	2.94231e-05	Significant	1	402.176	0.134394	1
FBgn0036665	CG13024	KO-Ctrl	KO-Zeus	OK	6.9655	19.6437	1.50814	2.99717	0.00272498	0.0270404	Significant	1	15.1478	0.503188	1
FBgn0036678	CG11905	KO-Ctrl	KO-Zeus	OK	157.92	281.34	0.826971	5.95874	2.54189e-09	1.29817e-07	Significant	1	173.544	0.138783	1
FBgn0036714	CG7692	KO-Ctrl	KO-Zeus	OK	977.188	1603.89	0.711815	6.09545	1.09131e-09	5.81755e-08	Significant	1	1683.8	0.116778	1
FBgn0036727	CG7589	KO-Ctrl	KO-Zeus	OK	275.989	416.083	0.600034	4.94906	7.45733e-07	2.45536e-05	Significant	1	342.241	0.121242	1
FBgn0036738	CG7542	KO-Ctrl	KO-Zeus	OK	749.044	166.882	-2.1602	-11.0711	1.73334e-28	4.06485e-26	Significant	-1	462.674	0.195122	-1
FBgn0036766	CG5506	KO-Ctrl	KO-Zeus	OK	572.809	219.32	-1.38061	-10.4055	2.33902e-25	4.2663e-23	Significant	-1	408.882	0.13268	-1
FBgn0036767	CG16775	KO-Ctrl	KO-Zeus	OK	115.896	65.4655	-0.814764	-4.0579	4.95164e-05	0.00101788	Significant	-1	80.8692	0.200785	-1
FBgn0036781	CG13699	KO-Ctrl	KO-Zeus	OK	18.3717	8.37087	-1.25319	-2.58034	0.00987032	0.0688645	Significant	-1	12.9027	0.485669	-1
FBgn0036789	AstC-R2	KO-Ctrl	KO-Zeus	OK	16.7838	42.7106	1.33931	3.64309	0.000269383	0.0041273	Significant	1	21.7329	0.36763	1
FBgn0036819	Dysb	KO-Ctrl	KO-Zeus	OK	21.3996	44.0481	1.01835	3.01927	0.00253381	0.0255628	Significant	1	35.9765	0.337282	1
FBgn0036831	CG6839	KO-Ctrl	KO-Zeus	OK	25.2969	4.15095	-2.56265	-4.48095	7.43102e-06	0.000190178	Significant	-1	13.7352	0.571898	-1
FBgn0036833	CG3819	KO-Ctrl	KO-Zeus	OK	67.488	13.9611	-2.32551	-6.86923	6.45503e-12	4.52285e-10	Significant	-1	34.9003	0.33854	-1
FBgn0036836	CG11619	KO-Ctrl	KO-Zeus	OK	57.8902	138.844	1.26121	6.53239	6.47292e-11	3.91475e-09	Significant	1	149.351	0.193071	1
FBgn0036857	CG9629	KO-Ctrl	KO-Zeus	OK	263.122	410.926	0.636956	5.06179	4.1533e-07	1.43752e-05	Significant	1	338.234	0.125836	1
FBgn0036939	CG7365	KO-Ctrl	KO-Zeus	OK	10.5693	36.4996	1.78136	4.26208	2.0253e-05	0.000472063	Significant	1	14.9551	0.417954	1
FBgn0037100	CapaR	KO-Ctrl	KO-Zeus	OK	14.6953	43.4173	1.5876	4.86493	1.14497e-06	3.54631e-05	Significant	1	35.0261	0.326336	1
FBgn0037207	Mes2	KO-Ctrl	KO-Zeus	OK	84.7567	52.9188	-0.650118	-2.91541	0.00355221	0.0332669	Significant	-1	61.4963	0.222994	-1
FBgn0037236	Skp2	KO-Ctrl	KO-Zeus	OK	104.64	161.659	0.634519	4.09529	4.21637e-05	0.000885747	Significant	1	115.1	0.154939	1
FBgn0037323	CG2663	KO-Ctrl	KO-Zeus	OK	16.5227	56.7992	1.7634	5.1814	2.20231e-07	8.12777e-06	Significant	1	59.7254	0.340332	1
FBgn0037326	CG14669	KO-Ctrl	KO-Zeus	OK	6.56973	32.9381	2.25898	4.97623	6.48341e-07	2.17204e-05	Significant	1	53.6775	0.453953	1
FBgn0037387	CG1213	KO-Ctrl	KO-Zeus	OK	595.783	332.518	-0.842588	-5.65593	1.55008e-08	7.06824e-07	Significant	-1	508.885	0.148974	-1
FBgn0037408	NPFR	KO-Ctrl	KO-Zeus	OK	50.1067	100.502	0.995739	4.55238	5.30418e-06	0.000139475	Significant	1	60.6444	0.218729	1
FBgn0037422	Osi13	KO-Ctrl	KO-Zeus	OK	82.1345	43.2581	-0.938312	-3.82387	0.000131375	0.00232967	Significant	-1	56.3964	0.245383	-1
FBgn0037447	Neurochondrin	KO-Ctrl	KO-Zeus	OK	215.089	346.172	0.686204	5.25021	1.51928e-07	5.81935e-06	Significant	1	270.951	0.1307	1
FBgn0037477	CG14610	KO-Ctrl	KO-Zeus	OK	7.88585	36.1078	2.16525	5.20635	1.9259e-07	7.18522e-06	Significant	1	28.6315	0.415885	1
FBgn0037485	CG14606	KO-Ctrl	KO-Zeus	OK	99.3816	152.164	0.609464	3.43767	0.000586741	0.00784894	Significant	1	147.316	0.17729	1
FBgn0037534	CG2781	KO-Ctrl	KO-Zeus	OK	137.848	228.125	0.730656	4.87725	1.07575e-06	3.40535e-05	Significant	1	161.963	0.149809	1
FBgn0037617	nom	KO-Ctrl	KO-Zeus	OK	345.29	213.188	-0.687386	-5.92937	3.041e-09	1.53939e-07	Significant	-1	221.349	0.115929	-1
FBgn0037624	CG8223	KO-Ctrl	KO-Zeus	OK	492.85	265.707	-0.888042	-7.44607	9.61627e-14	8.06573e-12	Significant	-1	412.65	0.119263	-1
FBgn0037724	Fst	KO-Ctrl	KO-Zeus	OK	639.93	218.532	-1.53767	-12.6546	1.05499e-36	5.0512e-34	Significant	-1	391.098	0.12151	-1
FBgn0037811	CG12592	KO-Ctrl	KO-Zeus	OK	49.2748	85.6526	0.795438	3.49808	0.000468626	0.00651918	Significant	1	74.2425	0.227393	1
FBgn0037836	CG14692	KO-Ctrl	KO-Zeus	OK	21.7978	44.3933	0.992313	3.02025	0.00252569	0.0255257	Significant	1	26.6285	0.328554	1
FBgn0037973	CG18547	KO-Ctrl	KO-Zeus	OK	289.501	130.863	-1.12534	-6.81499	9.4268e-12	6.26146e-10	Significant	-1	232.914	0.165128	-1
FBgn0037974	CG12224	KO-Ctrl	KO-Zeus	OK	95.7432	54.4295	-0.803843	-3.66024	0.000251981	0.00391816	Significant	-1	74.6796	0.219615	-1
FBgn0037975	CG3397	KO-Ctrl	KO-Zeus	OK	0.438707	14.8744	5.17888	4.23842	2.25101e-05	0.000518364	Significant	1	51.6504	1.22189	1
FBgn0037993	dpr15	KO-Ctrl	KO-Zeus	OK	24.4086	9.74177	-1.33566	-3.39859	0.000677342	0.00881465	Significant	-1	22.9889	0.393004	-1
FBgn0038067	CG11598	KO-Ctrl	KO-Zeus	OK	2954.8	1624.74	-0.861428	-11.3523	7.22229e-30	1.80416e-27	Significant	-1	2168.93	0.0758812	-1
FBgn0038068	CG11600	KO-Ctrl	KO-Zeus	OK	108.288	38.5274	-1.46657	-7.55574	4.16495e-14	3.59846e-12	Significant	-1	103.149	0.1941	-1
FBgn0038074	Gnmt	KO-Ctrl	KO-Zeus	OK	374.396	216.575	-0.788667	-4.77726	1.77696e-06	5.23564e-05	Significant	-1	229.478	0.165088	-1
FBgn0038082	CG5724	KO-Ctrl	KO-Zeus	OK	50.0532	23.5729	-1.05374	-3.92206	8.77967e-05	0.00167309	Significant	-1	59.4579	0.268671	-1
FBgn0038083	CG5999	KO-Ctrl	KO-Zeus	OK	19.6853	7.00577	-1.58276	-3.38068	0.000723073	0.00932529	Significant	-1	20.3706	0.468179	-1
FBgn0038151	yellow-e2	KO-Ctrl	KO-Zeus	OK	115.84	68.9615	-0.737151	-4.01251	6.0076e-05	0.001205	Significant	-1	107.933	0.183713	-1
FBgn0038194	Cyp6d5	KO-Ctrl	KO-Zeus	OK	1902.97	3025.45	0.670935	8.64814	5.23465e-18	5.99727e-16	Significant	1	2754.4	0.0775815	1
FBgn0038235	CG8461	KO-Ctrl	KO-Zeus	OK	63.0736	94.8367	0.585221	3.09744	0.00195202	0.0210148	Significant	1	89.7321	0.188937	1
FBgn0038257	smp-30	KO-Ctrl	KO-Zeus	OK	2051.28	1005.57	-1.02694	-7.04451	1.86116e-12	1.34507e-10	Significant	-1	1400.27	0.145779	-1
FBgn0038262	CG14857	KO-Ctrl	KO-Zeus	OK	75.406	147.535	0.968064	5.68115	1.33795e-08	6.19363e-07	Significant	1	111.019	0.170399	1
FBgn0038268	CG3631	KO-Ctrl	KO-Zeus	OK	70.9489	45.0252	-0.66915	-3.04847	0.00230009	0.0237962	Significant	-1	59.0406	0.219503	-1
FBgn0038291	CG3984	KO-Ctrl	KO-Zeus	OK	35.2414	15.7868	-1.19305	-3.01252	0.00259088	0.0259789	Significant	-1	16.22	0.396031	-1
FBgn0038295	Gyc88E	KO-Ctrl	KO-Zeus	OK	21.4508	44.6603	1.0504	3.44626	0.000568394	0.00763909	Significant	1	41.6311	0.304793	1
FBgn0038302	CG4210	KO-Ctrl	KO-Zeus	OK	76.6741	44.3864	-0.766416	-2.92125	0.00348635	0.0327629	Significant	-1	55.164	0.262359	-1
FBgn0038398	sxe2	KO-Ctrl	KO-Zeus	OK	5.67088	29.0777	2.36617	5.26846	1.37572e-07	5.30485e-06	Significant	1	48.4793	0.449119	1
FBgn0038407	CG6126	KO-Ctrl	KO-Zeus	OK	294.553	504.787	0.775636	8.00156	1.2285e-15	1.21696e-13	Significant	1	348.583	0.0969356	1
FBgn0038412	Zip89B	KO-Ctrl	KO-Zeus	OK	32.6365	62.3982	0.95961	3.79024	0.000150499	0.00258117	Significant	1	41.4613	0.253179	1
FBgn0038450	CG17560	KO-Ctrl	KO-Zeus	OK	85.65	199.166	1.22519	5.69785	1.2133e-08	5.66751e-07	Significant	1	98.8557	0.215026	1
FBgn0038451	CG14893	KO-Ctrl	KO-Zeus	OK	153.549	97.6202	-0.643794	-3.1655	0.00154816	0.0174482	Significant	-1	165.91	0.203378	-1
FBgn0038484	CG5246	KO-Ctrl	KO-Zeus	OK	116.287	24.2245	-2.28206	-9.44802	3.4531e-21	4.66819e-19	Significant	-1	101.037	0.241538	-1
FBgn0038485	CG5255	KO-Ctrl	KO-Zeus	OK	8.94913	1.39196	-2.65646	-2.81069	0.00494352	0.0426275	Significant	-1	6.76685	0.945128	-1
FBgn0038511	cysu	KO-Ctrl	KO-Zeus	OK	149.512	89.861	-0.755783	-4.77996	1.75329e-06	5.1792e-05	Significant	-1	98.5791	0.158115	-1
FBgn0038613	Vha100-4	KO-Ctrl	KO-Zeus	OK	97.5319	58.7934	-0.740728	-3.77262	0.000161543	0.00272583	Significant	-1	102.097	0.196343	-1
FBgn0038631	CG7695	KO-Ctrl	KO-Zeus	OK	20.062	3.84571	-2.27006	-4.04323	5.27205e-05	0.00107604	Significant	-1	11.1849	0.561448	-1
FBgn0038653	CG18208	KO-Ctrl	KO-Zeus	OK	19.9918	41.9166	1.01748	3.21048	0.00132515	0.0155064	Significant	1	36.7291	0.316924	1
FBgn0038658	CG14292	KO-Ctrl	KO-Zeus	OK	3852.36	7588.49	0.978577	12.3925	2.87119e-35	1.31971e-32	Significant	1	5488.12	0.0789656	1
FBgn0038705	CG11626	KO-Ctrl	KO-Zeus	OK	2.95525	28.6338	3.36778	5.4222	5.88702e-08	2.42465e-06	Significant	1	33.7331	0.621109	1
FBgn0038717	CG17751	KO-Ctrl	KO-Zeus	OK	115.452	268.78	1.20908	7.17714	7.11868e-13	5.56467e-11	Significant	1	150.17	0.168463	1
FBgn0038718	CG17752	KO-Ctrl	KO-Zeus	OK	710.412	1488.35	1.06434	14.1077	3.40731e-45	2.79667e-42	Significant	1	917.023	0.0754441	1
FBgn0038744	CG4733	KO-Ctrl	KO-Zeus	OK	212.678	129.914	-0.718382	-4.18134	2.89797e-05	0.000646613	Significant	-1	132.361	0.171807	-1
FBgn0038753	CG4459	KO-Ctrl	KO-Zeus	OK	8.83597	25.0239	1.49518	3.29847	0.000972128	0.0120374	Significant	1	15.6112	0.453293	1
FBgn0038837	CG3822	KO-Ctrl	KO-Zeus	OK	28.7741	54.916	0.915123	3.48749	0.00048757	0.00673398	Significant	1	36.5326	0.262401	1
FBgn0038851	dmrt93B	KO-Ctrl	KO-Zeus	OK	21.0957	53.3065	1.37862	3.46069	0.000538784	0.00732683	Significant	1	28.6502	0.398366	1
FBgn0038880	SIFaR	KO-Ctrl	KO-Zeus	OK	73.8883	41.9307	-0.804053	-3.41955	0.000627248	0.00828473	Significant	-1	53.7807	0.235134	-1
FBgn0038886	CG6475	KO-Ctrl	KO-Zeus	OK	3.22704	22.5746	2.79809	4.86513	1.1438e-06	3.54631e-05	Significant	1	32.778	0.575132	1
FBgn0039015	Takl2	KO-Ctrl	KO-Zeus	OK	16.9911	39.4026	1.24324	3.19188	0.0014135	0.0162914	Significant	1	32.1618	0.389502	1
FBgn0039024	CG4721	KO-Ctrl	KO-Zeus	OK	101.015	57.6788	-0.803879	-4.08871	4.3377e-05	0.000907915	Significant	-1	61.8451	0.196609	-1
FBgn0039031	Gbp3	KO-Ctrl	KO-Zeus	OK	39.2277	14.2747	-1.46148	-3.88815	0.000101013	0.00188737	Significant	-1	15.9689	0.375882	-1
FBgn0039033	Or94a	KO-Ctrl	KO-Zeus	OK	1.23267	8.67265	2.85854	3.04452	0.0023305	0.0240393	Significant	1	10.5577	0.938912	1
FBgn0039052	CG6733	KO-Ctrl	KO-Zeus	OK	270.804	438.887	0.697757	4.12381	3.72651e-05	0.000801897	Significant	1	467.463	0.169202	1
FBgn0039068	CG13827	KO-Ctrl	KO-Zeus	OK	61.1981	91.4433	0.596672	2.80086	0.00509673	0.0435046	Significant	1	82.3341	0.213032	1
FBgn0039167	CG17786	KO-Ctrl	KO-Zeus	OK	6.51852	16.6478	1.26617	2.5378	0.0111552	0.0750611	Significant	1	12.2747	0.498925	1
FBgn0039178	CG6356	KO-Ctrl	KO-Zeus	OK	35.7396	56.4739	0.666669	2.89841	0.00375062	0.0346673	Significant	1	57.6699	0.230012	1
FBgn0039203	CG13618	KO-Ctrl	KO-Zeus	OK	37.5539	117.069	1.65205	6.04869	1.46028e-09	7.55861e-08	Significant	1	40.5859	0.273125	1
FBgn0039305	CG11858	KO-Ctrl	KO-Zeus	OK	134.389	209.703	0.648408	4.63306	3.60296e-06	9.90469e-05	Significant	1	181.025	0.139952	1
FBgn0039312	CG10514	KO-Ctrl	KO-Zeus	OK	1839.77	2873.31	0.643147	8.61839	6.79002e-18	7.57516e-16	Significant	1	2390.89	0.074625	1
FBgn0039313	CG11892	KO-Ctrl	KO-Zeus	OK	2479.76	4205.81	0.762151	6.41631	1.39621e-10	8.27e-09	Significant	1	3257.88	0.118783	1
FBgn0039316	CG11893	KO-Ctrl	KO-Zeus	OK	0.877413	21.7692	4.7683	4.37024	1.24111e-05	0.000306481	Significant	1	18.2291	1.09109	1
FBgn0039342	CG5107	KO-Ctrl	KO-Zeus	OK	1853.84	462.714	-2.00097	-14.0434	8.45589e-45	6.47777e-42	Significant	-1	1293.55	0.142485	-1
FBgn0039386	CG5948	KO-Ctrl	KO-Zeus	OK	83.2571	45.5274	-0.888228	-3.66652	0.000245878	0.00383363	Significant	-1	42.7825	0.242254	-1
FBgn0039396	CCAP-R	KO-Ctrl	KO-Zeus	OK	17.1176	6.24575	-1.42412	-2.78872	0.00529163	0.0445793	Significant	-1	10.4301	0.510671	-1
FBgn0039444	TwdlD	KO-Ctrl	KO-Zeus	OK	1.71183	85.7187	5.73344	7.6165	2.60646e-14	2.26901e-12	Significant	1	43.4555	0.752766	1
FBgn0039452	CG14245	KO-Ctrl	KO-Zeus	OK	2062.76	3959.81	0.941768	8.00265	1.21768e-15	1.21673e-13	Significant	1	2416.68	0.117682	1
FBgn0039470	CG6296	KO-Ctrl	KO-Zeus	OK	46.9682	88.2233	0.915544	4.68326	2.82345e-06	7.93257e-05	Significant	1	76.0406	0.195493	1
FBgn0039471	CG6295	KO-Ctrl	KO-Zeus	OK	1285.01	397.767	-1.69083	-10.2982	7.17622e-25	1.23078e-22	Significant	-1	1073.08	0.164186	-1
FBgn0039472	CG17192	KO-Ctrl	KO-Zeus	OK	38.9584	10.0377	-1.97342	-5.99966	1.97731e-09	1.01434e-07	Significant	-1	146.506	0.328921	-1
FBgn0039474	CG6283	KO-Ctrl	KO-Zeus	OK	1227.6	530.467	-1.20908	-12.2142	2.61008e-34	1.03422e-31	Significant	-1	871.58	0.0989897	-1
FBgn0039476	CG6271	KO-Ctrl	KO-Zeus	OK	39.0236	15.9469	-1.29692	-3.7996	0.000144929	0.00250433	Significant	-1	29.3501	0.341332	-1
FBgn0039520	Gr98a	KO-Ctrl	KO-Zeus	OK	24.207	55.1049	1.19696	2.96581	0.0030189	0.0292991	Significant	1	27.8028	0.403586	1
FBgn0039585	CG1894	KO-Ctrl	KO-Zeus	OK	70.2167	223.103	1.65925	9.45588	3.20302e-21	4.38166e-19	Significant	1	127.85	0.175473	1
FBgn0039594	CG9990	KO-Ctrl	KO-Zeus	OK	96.1407	202.56	1.06753	7.11353	1.13109e-12	8.43987e-11	Significant	1	150.605	0.15007	1
FBgn0039602	CG1647	KO-Ctrl	KO-Zeus	OK	111.227	177.699	0.660734	4.39767	1.09418e-05	0.000272147	Significant	1	181.11	0.150246	1
FBgn0039620	wat	KO-Ctrl	KO-Zeus	OK	128.481	225.633	0.816428	6.34962	2.1585e-10	1.234e-08	Significant	1	222.324	0.128579	1
FBgn0039628	CG11841	KO-Ctrl	KO-Zeus	OK	48.6478	26.8286	-0.826166	-2.87654	0.0040206	0.0367758	Significant	-1	35.931	0.287208	-1
FBgn0039667	CG2010	KO-Ctrl	KO-Zeus	OK	86.519	141.866	0.718031	3.6728	0.000239904	0.00376604	Significant	1	91.4016	0.195499	1
FBgn0039679	ppk19	KO-Ctrl	KO-Zeus	OK	1.67137	17.0874	3.40798	3.79234	0.000149235	0.00256332	Significant	1	6.00619	0.898649	1
FBgn0039682	Obp99c	KO-Ctrl	KO-Zeus	OK	520.139	174.118	-1.5657	-7.73772	1.01212e-14	9.01569e-13	Significant	-1	235.971	0.202347	-1
FBgn0039769	CG15534	KO-Ctrl	KO-Zeus	OK	380.284	716.677	0.912145	7.81336	5.56814e-15	5.07806e-13	Significant	1	681.774	0.116742	1
FBgn0039778	Jon99Fi	KO-Ctrl	KO-Zeus	OK	160.997	335.121	1.06146	6.08839	1.1405e-09	6.01171e-08	Significant	1	462.084	0.174342	1
FBgn0039789	CG9717	KO-Ctrl	KO-Zeus	OK	71.9071	151.315	1.06017	5.66578	1.46359e-08	6.72724e-07	Significant	1	106.89	0.187118	1
FBgn0039798	CG11313	KO-Ctrl	KO-Zeus	OK	56.2215	16.489	-1.7699	-4.58776	4.48021e-06	0.000121654	Significant	-1	13.2407	0.385786	-1
FBgn0039800	Npc2g	KO-Ctrl	KO-Zeus	OK	136.185	65.417	-1.04308	-4.23455	2.29012e-05	0.000525266	Significant	-1	61.58	0.246325	-1
FBgn0039808	CG12071	KO-Ctrl	KO-Zeus	OK	20.3983	10.2589	-0.992528	-2.40185	0.0163122	0.0969705	Significant	-1	17.0096	0.413234	-1
FBgn0039932	fuss	KO-Ctrl	KO-Zeus	OK	97.9012	62.958	-0.640759	-3.46454	0.000531145	0.00724008	Significant	-1	69.4964	0.184948	-1
FBgn0040001	FASN3	KO-Ctrl	KO-Zeus	OK	196.014	341.38	0.788495	4.89973	9.59677e-07	3.07177e-05	Significant	1	171.483	0.160926	1
FBgn0040069	vanin-like	KO-Ctrl	KO-Zeus	OK	68.847	121.205	0.829088	4.7249	2.30226e-06	6.64706e-05	Significant	1	132.433	0.175472	1
FBgn0040104	lectin-24A	KO-Ctrl	KO-Zeus	OK	82.0162	10.9467	-2.97514	-8.23622	1.77742e-16	1.84003e-14	Significant	-1	34.776	0.361227	-1
FBgn0040251	Ugt86Di	KO-Ctrl	KO-Zeus	OK	3.50959	15.5157	2.06799	3.48698	0.000488506	0.0067388	Significant	1	11.1748	0.59306	1
FBgn0040255	Ugt86De	KO-Ctrl	KO-Zeus	OK	4.75301	19.3234	1.98116	3.64998	0.000262256	0.00403425	Significant	1	18.117	0.542786	1
FBgn0040318	HGTX	KO-Ctrl	KO-Zeus	OK	23.5097	95.1492	2.02122	8.35195	6.71424e-17	7.27862e-15	Significant	1	92.0214	0.242005	1
FBgn0040321	GNBP3	KO-Ctrl	KO-Zeus	OK	77.8523	26.4853	-1.54207	-3.98508	6.74564e-05	0.00133876	Significant	-1	32.9322	0.38696	-1
FBgn0040336	Seipin	KO-Ctrl	KO-Zeus	OK	94.4668	56.1373	-0.740958	-3.66846	0.000244012	0.0038168	Significant	-1	83.363	0.201981	-1
FBgn0040348	CG3703	KO-Ctrl	KO-Zeus	OK	44.8283	71.3366	0.651277	2.62395	0.00869168	0.0631031	Significant	1	56.3368	0.248205	1
FBgn0040350	CG3690	KO-Ctrl	KO-Zeus	OK	376.774	754.947	0.999794	11.9164	9.71683e-33	3.38352e-30	Significant	1	626.515	0.0839004	1
FBgn0040355	CG3526	KO-Ctrl	KO-Zeus	OK	397.271	127.912	-1.62708	-9.1302	6.83724e-20	8.92803e-18	Significant	-1	345.81	0.178208	-1
FBgn0040356	CG12498	KO-Ctrl	KO-Zeus	OK	658.713	329.668	-0.991125	-9.61797	6.71403e-22	9.64387e-20	Significant	-1	627.592	0.103049	-1
FBgn0040477	cid	KO-Ctrl	KO-Zeus	OK	22.5571	42.3696	0.963521	3.17749	0.00148554	0.0168846	Significant	1	36.7066	0.303233	1
FBgn0040532	CG8369	KO-Ctrl	KO-Zeus	OK	415.613	272.354	-0.604966	-3.114	0.00184567	0.020027	Significant	-1	282.546	0.194273	-1
FBgn0040606	CG6503	KO-Ctrl	KO-Zeus	OK	205.272	76.1995	-1.41592	-5.30724	1.113e-07	4.35016e-06	Significant	-1	88.883	0.266791	-1
FBgn0040723	CG5011	KO-Ctrl	KO-Zeus	OK	242.48	134.767	-0.837119	-6.07197	1.2635e-09	6.62964e-08	Significant	-1	222.23	0.137866	-1
FBgn0040732	CG16926	KO-Ctrl	KO-Zeus	OK	305.826	90.2526	-1.75959	-11.629	2.93409e-31	8.42891e-29	Significant	-1	178.516	0.15131	-1
FBgn0040733	CG15068	KO-Ctrl	KO-Zeus	OK	49.095	17.9177	-1.45958	-3.4639	0.000532412	0.00724875	Significant	-1	16.3318	0.421371	-1
FBgn0040736	IM3	KO-Ctrl	KO-Zeus	OK	59.104	22.1966	-1.38677	-4.8693	1.11993e-06	3.48755e-05	Significant	-1	27.7901	0.284798	-1
FBgn0040759	CG13177	KO-Ctrl	KO-Zeus	OK	14.8514	58.4549	1.96443	5.29734	1.17499e-07	4.56141e-06	Significant	1	23.724	0.370834	1
FBgn0040795	CG13038	KO-Ctrl	KO-Zeus	OK	0.427957	20.4012	5.50645	4.56699	4.94777e-06	0.000131914	Significant	1	46.6444	1.20571	1
FBgn0040813	Nplp2	KO-Ctrl	KO-Zeus	OK	861.651	293.035	-1.54894	-14.0328	9.82397e-45	7.05545e-42	Significant	-1	543.669	0.11038	-1
FBgn0040900	CG17777	KO-Ctrl	KO-Zeus	OK	229.058	135.787	-0.740263	-4.16196	3.15528e-05	0.000695919	Significant	-1	195.429	0.177864	-1
FBgn0041156	exex	KO-Ctrl	KO-Zeus	OK	38.5469	22.5858	-0.784505	-2.82796	0.0046846	0.0410296	Significant	-1	44.3073	0.27741	-1
FBgn0041160	comm2	KO-Ctrl	KO-Zeus	OK	119.764	73.6971	-0.687351	-3.78181	0.00015569	0.00265042	Significant	-1	94.7951	0.181752	-1
FBgn0041194	Prat2	KO-Ctrl	KO-Zeus	OK	222.531	124.61	-0.850043	-4.88517	1.03341e-06	3.29857e-05	Significant	-1	108.295	0.174005	-1
FBgn0041234	Gr59f	KO-Ctrl	KO-Zeus	OK	17.0019	35.6981	1.08799	3.05568	0.00224548	0.0234298	Significant	1	25.2175	0.356056	1
FBgn0041246	Gr32a	KO-Ctrl	KO-Zeus	OK	30.5586	8.06311	-2.02637	-5.31146	1.08748e-07	4.26493e-06	Significant	-1	79.0035	0.381508	-1
FBgn0041247	Gr28a	KO-Ctrl	KO-Zeus	OK	8.87649	2.40197	-1.79674	-2.56316	0.0103725	0.0714954	Significant	-1	9.81808	0.700986	-1
FBgn0041579	AttC	KO-Ctrl	KO-Zeus	OK	153.34	46.6765	-1.7126	-7.12012	1.07832e-12	8.15195e-11	Significant	-1	78.6331	0.24053	-1
FBgn0042627	FASN2	KO-Ctrl	KO-Zeus	OK	395.063	648.438	0.709233	4.01674	5.90095e-05	0.00118753	Significant	1	372.041	0.17657	1
FBgn0043470	lambdaTry	KO-Ctrl	KO-Zeus	OK	211.23	385.117	0.873313	5.18021	2.21637e-07	8.13683e-06	Significant	1	564.997	0.168586	1
FBgn0043471	kappaTry	KO-Ctrl	KO-Zeus	OK	197.191	96.2198	-1.00362	-6.56129	5.33433e-11	3.24321e-09	Significant	-1	279.155	0.15296	-1
FBgn0043578	PGRP-SB1	KO-Ctrl	KO-Zeus	OK	40.4554	8.92804	-2.17703	-4.30875	1.64182e-05	0.000393865	Significant	-1	14.5604	0.505259	-1
FBgn0043792	CG30427	KO-Ctrl	KO-Zeus	OK	51.603	123.764	1.25843	5.52638	3.26904e-08	1.41753e-06	Significant	1	120.962	0.227712	1
FBgn0043806	CG32032	KO-Ctrl	KO-Zeus	OK	52.8705	78.8785	0.586539	2.66633	0.00766835	0.0575904	Significant	1	57.861	0.21998	1
FBgn0046763	CG17278	KO-Ctrl	KO-Zeus	OK	44.5863	76.4939	0.757266	2.83628	0.00456429	0.0401902	Significant	1	62.047	0.266993	1
FBgn0050043	CG30043	KO-Ctrl	KO-Zeus	OK	16.3022	43.8643	1.44425	4.76715	1.86847e-06	5.4772e-05	Significant	1	61.0194	0.302959	1
FBgn0050272	MFS1	KO-Ctrl	KO-Zeus	OK	8.30312	1.39196	-2.52998	-2.80267	0.00506817	0.0433643	Significant	-1	7.768	0.902702	-1
FBgn0050277	Oatp58Da	KO-Ctrl	KO-Zeus	OK	123.897	290.177	1.21487	7.45104	9.26075e-14	7.82465e-12	Significant	1	221.388	0.163047	1
FBgn0050345	CG30345	KO-Ctrl	KO-Zeus	OK	353.521	209.347	-0.760991	-5.082	3.73486e-07	1.30448e-05	Significant	-1	219.425	0.149743	-1
FBgn0050360	Mal-A6	KO-Ctrl	KO-Zeus	OK	3824.08	1513.92	-1.3377	-10.4413	1.60569e-25	3.02475e-23	Significant	-1	2352.53	0.128116	-1
FBgn0050371	CG30371	KO-Ctrl	KO-Zeus	OK	184.414	418.105	1.17998	9.27744	1.73603e-20	2.29296e-18	Significant	1	229.95	0.127188	1
FBgn0050411	CG30411	KO-Ctrl	KO-Zeus	OK	48.6321	74.374	0.62798	2.92232	0.00347435	0.0326976	Significant	1	86.5403	0.214891	1
FBgn0050440	CG30440	KO-Ctrl	KO-Zeus	OK	144.845	91.945	-0.658026	-3.27714	0.00104863	0.0127917	Significant	-1	94.9354	0.200793	-1
FBgn0051087	CG31087	KO-Ctrl	KO-Zeus	OK	70.8926	35.2835	-1.02112	-4.49896	6.82872e-06	0.000176335	Significant	-1	72.3248	0.226969	-1
FBgn0051104	CG31104	KO-Ctrl	KO-Zeus	OK	316.835	47.8461	-2.71386	-13.9978	1.608e-44	1.08691e-41	Significant	-1	212.145	0.193878	-1
FBgn0051106	CG31106	KO-Ctrl	KO-Zeus	OK	570.758	1073.02	0.909177	10.8666	1.66329e-27	3.60621e-25	Significant	1	657.571	0.0836673	1
FBgn0051148	Gba1a	KO-Ctrl	KO-Zeus	OK	259.011	162.804	-0.672272	-4.96279	6.94872e-07	2.31443e-05	Significant	-1	240.678	0.135462	-1
FBgn0051163	SKIP	KO-Ctrl	KO-Zeus	OK	85.16	152.801	0.843822	5.11204	3.18704e-07	1.13149e-05	Significant	1	107.52	0.165066	1
FBgn0051199	CG31199	KO-Ctrl	KO-Zeus	OK	11.1963	31.1974	1.46955	4.15712	3.22281e-05	0.000708094	Significant	1	43.6711	0.353501	1
FBgn0051233	CG31233	KO-Ctrl	KO-Zeus	OK	102.277	766.757	2.90901	22.822	2.77022e-115	7.95816e-112	Significant	1	1177.15	0.127465	1
FBgn0051265	CG31265	KO-Ctrl	KO-Zeus	OK	24.2581	66.3154	1.45747	5.61681	1.9452e-08	8.63022e-07	Significant	1	93.6241	0.259484	1
FBgn0051266	CG31266	KO-Ctrl	KO-Zeus	OK	58.7518	106.863	0.879133	3.84262	0.000121728	0.00219934	Significant	1	133.363	0.228785	1
FBgn0051343	CG31343	KO-Ctrl	KO-Zeus	OK	1487.34	2487.82	0.739489	7.8161	5.44839e-15	5.00859e-13	Significant	1	3465.85	0.094611	1
FBgn0051371	CG31371	KO-Ctrl	KO-Zeus	OK	46.2337	17.9353	-1.35671	-3.95496	7.65463e-05	0.00149337	Significant	-1	23.0448	0.34304	-1
FBgn0051373	CG31373	KO-Ctrl	KO-Zeus	OK	377.585	567.589	0.589815	2.96468	0.00303	0.0293573	Significant	1	500.495	0.198947	1
FBgn0051374	sals	KO-Ctrl	KO-Zeus	OK	105.281	161.306	0.609756	3.30175	0.000960852	0.0119235	Significant	1	119.569	0.184677	1
FBgn0051410	Npc2e	KO-Ctrl	KO-Zeus	OK	92.8069	34.566	-1.3999	-5.18101	2.20683e-07	8.12777e-06	Significant	-1	101.634	0.270198	-1
FBgn0051559	CG31559	KO-Ctrl	KO-Zeus	OK	3.00893	11.5879	1.83046	3.03177	0.00243127	0.0247675	Significant	1	29.1995	0.603759	1
FBgn0051769	CG31769	KO-Ctrl	KO-Zeus	OK	58.3719	27.3175	-1.09515	-3.90081	9.58731e-05	0.00180183	Significant	-1	25.5179	0.280749	-1
FBgn0051815	CG31815	KO-Ctrl	KO-Zeus	OK	727.624	15.3135	-5.51178	-22.982	7.06209e-117	2.70501e-113	Significant	-1	520.192	0.239831	-1
FBgn0051935	CG31935	KO-Ctrl	KO-Zeus	OK	509.739	229.443	-1.1605	-12.0232	2.6846e-33	9.9512e-31	Significant	-1	893.789	0.0965218	-1
FBgn0052006	CG32006	KO-Ctrl	KO-Zeus	OK	82.2533	36.8512	-1.15244	-5.25423	1.48645e-07	5.71263e-06	Significant	-1	289.635	0.219336	-1
FBgn0052072	Elo68alpha	KO-Ctrl	KO-Zeus	OK	31.0915	128.248	2.04147	7.88428	3.16344e-15	3.00422e-13	Significant	1	79.9195	0.258929	1
FBgn0052203	Spn75F	KO-Ctrl	KO-Zeus	OK	76.6957	888.322	3.5496	23.0228	2.75378e-117	1.58219e-113	Significant	1	1678.97	0.154178	1
FBgn0052255	Gr64f	KO-Ctrl	KO-Zeus	OK	22.4117	46.492	1.05201	3.22603	0.00125521	0.014885	Significant	1	27.9031	0.326101	1
FBgn0052266	CG32266	KO-Ctrl	KO-Zeus	OK	33.3577	14.5838	-1.17243	-3.37999	0.000724892	0.00933827	Significant	-1	20.176	0.346874	-1
FBgn0052296	Mrtf	KO-Ctrl	KO-Zeus	OK	365.33	583.168	0.669549	3.13741	0.0017045	0.0188876	Significant	1	518.543	0.213408	1
FBgn0052354	CG32354	KO-Ctrl	KO-Zeus	OK	27.1267	55.0243	0.991067	3.43643	0.000589438	0.00786671	Significant	1	49.3533	0.2884	1
FBgn0052368	CG32368	KO-Ctrl	KO-Zeus	OK	59.0287	36.9699	-0.638655	-2.70997	0.00672884	0.0526329	Significant	-1	118.818	0.235668	-1
FBgn0052406	PVRAP	KO-Ctrl	KO-Zeus	OK	33.6188	14.5969	-1.1559	-3.1879	0.00143311	0.016461	Significant	-1	21.0435	0.362589	-1
FBgn0052407	CG32407	KO-Ctrl	KO-Zeus	OK	37.734	140.617	1.89152	10.4206	1.99764e-25	3.70239e-23	Significant	1	229.32	0.181518	1
FBgn0052418	vito	KO-Ctrl	KO-Zeus	OK	47.6712	90.251	0.946274	4.12185	3.75847e-05	0.000805756	Significant	1	64.6508	0.229575	1
FBgn0052475	mthl8	KO-Ctrl	KO-Zeus	OK	0.438707	31.8504	6.19538	5.15774	2.49945e-07	9.11783e-06	Significant	1	68.9793	1.20118	1
FBgn0052483	CG32483	KO-Ctrl	KO-Zeus	OK	88.2765	40.3355	-1.11581	-5.15052	2.59759e-07	9.38645e-06	Significant	-1	83.8532	0.216639	-1
FBgn0052547	CG32547	KO-Ctrl	KO-Zeus	OK	28.1553	59.5528	1.08241	3.94677	7.92119e-05	0.00153754	Significant	1	36.8749	0.274253	1
FBgn0052564	CG32564	KO-Ctrl	KO-Zeus	OK	1.84897	13.0042	2.73125	3.01983	0.00252915	0.0255382	Significant	1	5.59121	0.904438	1
FBgn0052581	CG32581	KO-Ctrl	KO-Zeus	OK	456.822	274.103	-0.732347	-5.43703	5.41773e-08	2.25205e-06	Significant	-1	444.139	0.134696	-1
FBgn0052598	betaNACtes6	KO-Ctrl	KO-Zeus	OK	17.4323	64.663	1.87856	6.72729	1.72854e-11	1.11588e-09	Significant	1	51.0222	0.279245	1
FBgn0052656	Muc11A	KO-Ctrl	KO-Zeus	OK	2010.99	5430.52	1.43222	8.73684	2.39713e-18	2.78236e-16	Significant	1	3179.98	0.163929	1
FBgn0052669	CG32669	KO-Ctrl	KO-Zeus	OK	94.8675	150.86	0.665269	4.25023	2.13549e-05	0.000493741	Significant	1	148.233	0.156525	1
FBgn0052671	Rab9Fa	KO-Ctrl	KO-Zeus	OK	0	2.93094	3.67696	2.73839	0.00617414	0.0494405	Significant	1	5.62878	1.34275	1
FBgn0052791	DIP-alpha	KO-Ctrl	KO-Zeus	OK	23.2461	10.2248	-1.13249	-2.8055	0.00502388	0.0431773	Significant	-1	16.3262	0.403666	-1
FBgn0052816	CG32816	KO-Ctrl	KO-Zeus	OK	54.7276	35.5085	-0.621282	-2.6251	0.00866238	0.0630129	Significant	-1	56.9794	0.23667	-1
FBgn0052843	Dh31-R	KO-Ctrl	KO-Zeus	OK	138.904	218.295	0.638579	4.57218	4.82677e-06	0.000128987	Significant	1	203.767	0.139666	1
FBgn0053012	CG33012	KO-Ctrl	KO-Zeus	OK	10.3512	35.3669	1.75143	4.30482	1.67125e-05	0.000399259	Significant	1	51.6239	0.406854	1
FBgn0053109	CG33109	KO-Ctrl	KO-Zeus	OK	8.39726	62.6279	2.88824	6.83544	8.17536e-12	5.52606e-10	Significant	1	16.2964	0.42254	1
FBgn0053120	CG33120	KO-Ctrl	KO-Zeus	OK	44.6483	22.3528	-0.997	-2.88619	0.00389937	0.0357888	Significant	-1	30.592	0.345438	-1
FBgn0053192	MtnD	KO-Ctrl	KO-Zeus	OK	33.1182	81.1399	1.30946	5.51353	3.51717e-08	1.51939e-06	Significant	1	67.851	0.237499	1
FBgn0053223	CG33223	KO-Ctrl	KO-Zeus	OK	13.4221	233.978	4.10571	14.1221	2.77771e-45	2.45529e-42	Significant	1	216.015	0.29073	1
FBgn0053281	CG33281	KO-Ctrl	KO-Zeus	OK	581.231	902.789	0.638399	6.61445	3.72945e-11	2.32908e-09	Significant	1	790.567	0.0965159	1
FBgn0053307	CG33307	KO-Ctrl	KO-Zeus	OK	19.4779	7.52488	-1.4014	-3.53903	0.000401607	0.00576858	Significant	-1	83.8641	0.395984	-1
FBgn0053325	CG33325	KO-Ctrl	KO-Zeus	OK	206.748	104.173	-0.978216	-5.68899	1.27795e-08	5.94532e-07	Significant	-1	165.756	0.171949	-1
FBgn0053346	CG33346	KO-Ctrl	KO-Zeus	OK	276.931	59.0878	-2.21307	-9.91914	3.43712e-23	5.26612e-21	Significant	-1	124.105	0.223111	-1
FBgn0053511	CG33511	KO-Ctrl	KO-Zeus	OK	50.8761	169.375	1.73465	9.11591	7.80142e-20	1.00726e-17	Significant	1	79.6246	0.190288	1
FBgn0053519	Unc-89	KO-Ctrl	KO-Zeus	OK	158.263	271.435	0.767899	3.27371	0.00106146	0.0128799	Significant	1	200.253	0.234566	1
FBgn0053530	Acp53C14c	KO-Ctrl	KO-Zeus	OK	1299.53	617.266	-1.07005	-8.55578	1.1707e-17	1.29351e-15	Significant	-1	1036.21	0.125068	-1
FBgn0053665	CG33665	KO-Ctrl	KO-Zeus	OK	175.077	75.0013	-1.22994	-5.36691	8.0099e-08	3.21824e-06	Significant	-1	160.198	0.229172	-1
FBgn0053667	CG33667	KO-Ctrl	KO-Zeus	OK	73.2366	34.4126	-1.07981	-3.60674	0.000310067	0.00464534	Significant	-1	57.3431	0.299387	-1
FBgn0053669	CG33669	KO-Ctrl	KO-Zeus	OK	0	45.1421	7.63516	6.2591	3.87204e-10	2.17042e-08	Significant	1	24.6143	1.21985	1
FBgn0053971	Ir62a	KO-Ctrl	KO-Zeus	OK	8.6286	25.2208	1.50818	3.47476	0.00051131	0.00699459	Significant	1	16.1482	0.434039	1
FBgn0054025	CG34025	KO-Ctrl	KO-Zeus	OK	2.36038	58.8461	4.62378	7.49174	6.79675e-14	5.78529e-12	Significant	1	75.454	0.617183	1
FBgn0054026	CG34026	KO-Ctrl	KO-Zeus	OK	231.51	44.4576	-2.38581	-12.075	1.4313e-33	5.48234e-31	Significant	-1	167.254	0.197582	-1
FBgn0054040	CG34040	KO-Ctrl	KO-Zeus	OK	713.164	216.122	-1.73264	-12.2842	1.10084e-34	4.86531e-32	Significant	-1	231.958	0.141046	-1
FBgn0058178	CG40178	KO-Ctrl	KO-Zeus	OK	488.78	317.507	-0.623476	-4.56621	4.96613e-06	0.000132097	Significant	-1	345.473	0.136541	-1
FBgn0063492	GstE8	KO-Ctrl	KO-Zeus	OK	136.93	78.2798	-0.794102	-3.68703	0.00022689	0.0036011	Significant	-1	103.703	0.215378	-1
FBgn0064237	Idgf5	KO-Ctrl	KO-Zeus	OK	39.0022	13.1464	-1.5016	-4.14874	3.34309e-05	0.000730331	Significant	-1	30.7217	0.361941	-1
FBgn0066114	GlcAT-I	KO-Ctrl	KO-Zeus	OK	74.5774	129.302	0.802928	3.9439	8.01681e-05	0.00154825	Significant	1	96.2663	0.203587	1
FBgn0067905	IM14	KO-Ctrl	KO-Zeus	OK	266.53	169.987	-0.645614	-3.56162	0.000368577	0.00535439	Significant	-1	206.108	0.18127	-1
FBgn0083938	BG642163	KO-Ctrl	KO-Zeus	OK	11391.1	7493.16	-0.604585	-5.85863	4.66705e-09	2.30168e-07	Significant	-1	10077.2	0.103196	-1
FBgn0083945	CG34109	KO-Ctrl	KO-Zeus	OK	87.7432	201.05	1.1818	7.29276	3.03678e-13	2.40659e-11	Significant	1	194.573	0.162051	1
FBgn0085195	CG34166	KO-Ctrl	KO-Zeus	OK	544.509	282.607	-0.941079	-6.60072	4.09168e-11	2.54149e-09	Significant	-1	209.646	0.142572	-1
FBgn0085205	CG34176	KO-Ctrl	KO-Zeus	OK	98.4208	61.0771	-0.678163	-3.77897	0.000157476	0.0026729	Significant	-1	107.804	0.179457	-1
FBgn0085234	CG34205	KO-Ctrl	KO-Zeus	OK	2.37113	11.0937	2.15465	2.77232	0.00556586	0.0460456	Significant	1	7.99407	0.777201	1
FBgn0085241	CG34212	KO-Ctrl	KO-Zeus	OK	35.457	179.62	2.32649	10.2064	1.85541e-24	3.08994e-22	Significant	1	55.1188	0.227944	1
FBgn0085358	Diedel3	KO-Ctrl	KO-Zeus	OK	300.908	69.3473	-2.10365	-11.4568	2.17426e-30	5.81033e-28	Significant	-1	248.098	0.183616	-1
FBgn0085420	DIP-delta	KO-Ctrl	KO-Zeus	OK	11.5814	225.818	4.32179	14.3713	7.83571e-47	8.18547e-44	Significant	1	196.555	0.300724	1
FBgn0085424	nub	KO-Ctrl	KO-Zeus	OK	121.001	79.2417	-0.647735	-3.4325	0.000598052	0.00792643	Significant	-1	104.651	0.188707	-1
FBgn0085453	CG34424	KO-Ctrl	KO-Zeus	OK	135.892	64.6898	-1.05528	-4.23391	2.29658e-05	0.000525698	Significant	-1	70.6025	0.249245	-1
FBgn0085455	CG34426	KO-Ctrl	KO-Zeus	OK	148.858	290.969	0.972902	5.92544	3.11453e-09	1.56284e-07	Significant	1	224.186	0.16419	1
FBgn0085459	CG34430	KO-Ctrl	KO-Zeus	OK	14.0062	2.21689	-2.71036	-3.47603	0.000508897	0.00698002	Significant	-1	6.22785	0.779729	-1
FBgn0085465	CG34436	KO-Ctrl	KO-Zeus	OK	122.881	67.6824	-0.856792	-3.8182	0.000134429	0.0023684	Significant	-1	109.22	0.224397	-1
FBgn0085476	CG34447	KO-Ctrl	KO-Zeus	OK	265.271	152.264	-0.799162	-6.38441	1.72062e-10	9.98566e-09	Significant	-1	385.962	0.125174	-1
FBgn0086408	stl	KO-Ctrl	KO-Zeus	OK	160.867	96.9163	-0.743966	-3.28277	0.00102794	0.012619	Significant	-1	121.726	0.226628	-1
FBgn0086558	Ubi-p5E	KO-Ctrl	KO-Zeus	OK	2629.95	1522.61	-0.788812	-6.24889	4.13372e-10	2.30585e-08	Significant	-1	2480.28	0.126232	-1
FBgn0086675	fne	KO-Ctrl	KO-Zeus	OK	5.06526	16.5795	1.67725	2.90188	0.00370934	0.0344019	Significant	1	7.1716	0.577987	1
FBgn0087002	apolpp	KO-Ctrl	KO-Zeus	OK	2471.93	1203.5	-1.03878	-9.04896	1.44343e-19	1.82268e-17	Significant	-1	1305.07	0.114796	-1
FBgn0250757	CG42235	KO-Ctrl	KO-Zeus	OK	1458.64	3024.23	1.05048	15.3182	5.78327e-53	9.49364e-50	Significant	1	2076.78	0.0685775	1
FBgn0250836	CG8628	KO-Ctrl	KO-Zeus	OK	114.355	242.36	1.09462	7.09073	1.33407e-12	9.82681e-11	Significant	1	244.779	0.154373	1
FBgn0250842	CG17575	KO-Ctrl	KO-Zeus	OK	8556.14	5433.59	-0.654653	-4.92917	8.25786e-07	2.68054e-05	Significant	-1	6192.13	0.132812	-1
FBgn0259183	CG42287	KO-Ctrl	KO-Zeus	OK	572.511	365.325	-0.646486	-6.20194	5.57712e-10	3.05175e-08	Significant	-1	438.355	0.104239	-1
FBgn0259213	CG42313	KO-Ctrl	KO-Zeus	OK	215.424	44.7415	-2.24869	-9.84165	7.44801e-23	1.11149e-20	Significant	-1	134.065	0.228487	-1
FBgn0259246	brp	KO-Ctrl	KO-Zeus	OK	128.863	216.881	0.73586	4.84866	1.24299e-06	3.77864e-05	Significant	1	372.15	0.151766	1
FBgn0259710	CG42364	KO-Ctrl	KO-Zeus	OK	81.7097	128.136	0.666801	3.45247	0.000555476	0.00750938	Significant	1	116.077	0.193137	1
FBgn0259715	CG42369	KO-Ctrl	KO-Zeus	OK	25.2322	8.31563	-1.58059	-3.81791	0.000134589	0.0023684	Significant	-1	41.2862	0.413995	-1
FBgn0259953	Sfp24Bd	KO-Ctrl	KO-Zeus	OK	4.86617	20.7627	2.08019	3.92339	8.73101e-05	0.00166658	Significant	1	14.4439	0.530201	1
FBgn0259954	CG42464	KO-Ctrl	KO-Zeus	OK	409.737	213.448	-0.93318	-4.95937	7.0723e-07	2.34201e-05	Significant	-1	229.529	0.188165	-1
FBgn0259955	CG42465	KO-Ctrl	KO-Zeus	OK	111.883	66.3416	-0.741602	-3.48772	0.000487152	0.00673398	Significant	-1	124.461	0.212632	-1
FBgn0259964	Sfp33A3	KO-Ctrl	KO-Zeus	OK	4043	2659.95	-0.60338	-3.92434	8.69692e-05	0.00166283	Significant	-1	3538.28	0.153753	-1
FBgn0259965	Sfp35C	KO-Ctrl	KO-Zeus	OK	939.176	611.833	-0.614705	-3.48344	0.000495012	0.0068122	Significant	-1	1167.55	0.176465	-1
FBgn0259970	Sfp70A4	KO-Ctrl	KO-Zeus	OK	1107.32	573.034	-0.947232	-5.03931	4.67218e-07	1.60263e-05	Significant	-1	1051.18	0.187969	-1
FBgn0259973	Sfp79B	KO-Ctrl	KO-Zeus	OK	198.131	30.562	-2.68073	-9.52431	1.66135e-21	2.30007e-19	Significant	-1	203.367	0.281462	-1
FBgn0259994	CG42492	KO-Ctrl	KO-Zeus	OK	101.553	66.0526	-0.635961	-2.96499	0.00302697	0.0293527	Significant	-1	75.4529	0.21449	-1
FBgn0259998	CG17571	KO-Ctrl	KO-Zeus	OK	403.639	1037.57	1.36645	8.87736	6.84676e-19	8.11094e-17	Significant	1	2095.94	0.153925	1
FBgn0260753	Pdfr	KO-Ctrl	KO-Zeus	OK	41.5988	85.9903	1.02223	4.67447	2.94718e-06	8.21992e-05	Significant	1	63.8009	0.218685	1
FBgn0261057	Sfp36F	KO-Ctrl	KO-Zeus	OK	192.071	91.0756	-1.07188	-2.47247	0.0134183	0.085282	Significant	-1	172.443	0.433525	-1
FBgn0261085	Syt12	KO-Ctrl	KO-Zeus	OK	0	25.9086	6.82644	5.61041	2.01853e-08	8.92115e-07	Significant	1	21.4669	1.21675	1
FBgn0261089	Sytalpha	KO-Ctrl	KO-Zeus	OK	27.5712	12.7088	-1.1238	-2.99899	0.00270878	0.0269261	Significant	-1	25.5492	0.374728	-1
FBgn0261349	Mst36Fb	KO-Ctrl	KO-Zeus	OK	206.802	34.457	-2.5378	-14.9716	1.12557e-50	1.29339e-47	Significant	-1	2787.35	0.169507	-1
FBgn0261508	CG42656	KO-Ctrl	KO-Zeus	OK	163.522	75.783	-1.10494	-3.60947	0.000306829	0.00460283	Significant	-1	75.2803	0.306123	-1
FBgn0261560	Thor	KO-Ctrl	KO-Zeus	OK	1394.73	887.868	-0.652392	-7.83564	4.66447e-15	4.35768e-13	Significant	-1	1191.63	0.0832595	-1
FBgn0261575	tobi	KO-Ctrl	KO-Zeus	OK	3605.35	1342.39	-1.42551	-11.7398	7.96557e-32	2.34698e-29	Significant	-1	1718.96	0.121425	-1
FBgn0261584	CG42694	KO-Ctrl	KO-Zeus	OK	162.606	88.3027	-0.862563	-5.82264	5.7926e-09	2.78505e-07	Significant	-1	196.268	0.14814	-1
FBgn0261612	CngA	KO-Ctrl	KO-Zeus	OK	65.3804	39.2146	-0.729848	-3.52196	0.000428374	0.0060979	Significant	-1	79.2726	0.207228	-1
FBgn0261807	CG42753	KO-Ctrl	KO-Zeus	OK	869.297	560.793	-0.628667	-4.93115	8.17452e-07	2.661e-05	Significant	-1	766.422	0.127489	-1
FBgn0261817	CG42759	KO-Ctrl	KO-Zeus	OK	0	31.261	7.12486	5.87126	4.32496e-09	2.14216e-07	Significant	1	22.6805	1.21351	1
FBgn0261930	vnd	KO-Ctrl	KO-Zeus	OK	48.1555	23.1359	-1.09059	-3.83115	0.000127545	0.00227935	Significant	-1	51.9992	0.284664	-1
FBgn0262007	CG42825	KO-Ctrl	KO-Zeus	OK	287.055	81.726	-1.80036	-11.6196	3.27745e-31	9.18567e-29	Significant	-1	202.049	0.154942	-1
FBgn0262010	CG42828	KO-Ctrl	KO-Zeus	OK	33.9179	76.0264	1.1832	5.27114	1.35582e-07	5.24569e-06	Significant	1	372.134	0.224467	1
FBgn0262099	CG42852	KO-Ctrl	KO-Zeus	OK	3871.01	2212.4	-0.8068	-3.01417	0.0025768	0.0258603	Significant	-1	3667.98	0.267669	-1
FBgn0262146	MtnE	KO-Ctrl	KO-Zeus	OK	39.7557	104.981	1.42761	6.19638	5.77779e-10	3.14657e-08	Significant	1	115.453	0.230394	1
FBgn0262358	CG43056	KO-Ctrl	KO-Zeus	OK	106.433	67.4036	-0.664215	-3.50057	0.000464273	0.00649021	Significant	-1	120.832	0.189745	-1
FBgn0262362	CG43060	KO-Ctrl	KO-Zeus	OK	30.1819	10.3318	-1.57345	-3.38239	0.00071858	0.00927776	Significant	-1	13.8787	0.465189	-1
FBgn0262363	CG43061	KO-Ctrl	KO-Zeus	OK	15.153	27.23	0.980257	3.17299	0.00150876	0.0170306	Significant	1	300.929	0.308938	1
FBgn0262366	CG43064	KO-Ctrl	KO-Zeus	OK	23.4668	10.0876	-1.217	-3.16538	0.00154879	0.0174482	Significant	-1	27.6011	0.384471	-1
FBgn0262508	CG43078	KO-Ctrl	KO-Zeus	OK	304.832	509.998	0.737083	3.70651	0.000210135	0.00339328	Significant	1	437.156	0.198862	1
FBgn0262579	Ect4	KO-Ctrl	KO-Zeus	OK	1038.2	1769.6	0.766878	5.3129	1.07896e-07	4.24601e-06	Significant	1	1303.29	0.144343	1
FBgn0262621	CG43145	KO-Ctrl	KO-Zeus	OK	305.954	155.934	-0.966042	-4.87547	1.08549e-06	3.42676e-05	Significant	-1	315.726	0.198143	-1
FBgn0262717	Skeletor	KO-Ctrl	KO-Zeus	OK	107.461	68.9429	-0.652912	-2.85098	0.00435844	0.0389854	Significant	-1	52.6817	0.229013	-1
FBgn0262794	CG43175	KO-Ctrl	KO-Zeus	OK	206.381	118.914	-0.795525	-3.72125	0.000198235	0.00322195	Significant	-1	156.58	0.213779	-1
FBgn0262870	axo	KO-Ctrl	KO-Zeus	OK	163.477	350.79	1.09014	6.23109	4.632e-10	2.55896e-08	Significant	1	249.746	0.174951	1
FBgn0262948	CG43267	KO-Ctrl	KO-Zeus	OK	410.022	247.196	-0.724727	-3.44818	0.000564368	0.00760276	Significant	-1	302.5	0.210176	-1
FBgn0263220	Hk	KO-Ctrl	KO-Zeus	OK	34.5093	60.5717	0.784776	3.01716	0.00255151	0.0257009	Significant	1	45.4805	0.260104	1
FBgn0263235	Phae2	KO-Ctrl	KO-Zeus	OK	209.871	48.4734	-2.11687	-7.94629	1.92186e-15	1.85581e-13	Significant	-1	157.034	0.266398	-1
FBgn0263321	CG43402	KO-Ctrl	KO-Zeus	OK	126.1	49.7442	-1.31876	-5.70155	1.18723e-08	5.56837e-07	Significant	-1	232.565	0.231298	-1
FBgn0263390	Nha2	KO-Ctrl	KO-Zeus	OK	118.588	190.05	0.674171	3.83392	0.000126117	0.0022644	Significant	1	165.731	0.175844	1
FBgn0263399	CG43445	KO-Ctrl	KO-Zeus	OK	0	5.33097	4.50788	3.4825	0.000496748	0.00682791	Significant	1	8.07257	1.29444	1
FBgn0263403	CG43449	KO-Ctrl	KO-Zeus	OK	267.615	430.701	0.686151	5.54336	2.96721e-08	1.29152e-06	Significant	1	531.399	0.123779	1
FBgn0263763	CG43680	KO-Ctrl	KO-Zeus	OK	8.83349	62.407	2.84812	5.39862	6.71561e-08	2.73649e-06	Significant	1	12.6142	0.527564	1
FBgn0263777	CG43694	KO-Ctrl	KO-Zeus	OK	215.774	121.818	-0.810184	-3.82249	0.000132111	0.00233194	Significant	-1	137.832	0.211952	-1
FBgn0263997	CG43740	KO-Ctrl	KO-Zeus	OK	29.611	54.8393	0.86749	3.50618	0.000454586	0.0063703	Significant	1	50.7905	0.247417	1
FBgn0264000	GluRIB	KO-Ctrl	KO-Zeus	OK	55.2902	87.1308	0.639885	3.19248	0.00141058	0.0162741	Significant	1	93.0534	0.200435	1
FBgn0264001	bru3	KO-Ctrl	KO-Zeus	OK	134.949	217.945	0.691041	3.86454	0.0001113	0.00204304	Significant	1	165.419	0.178816	1
FBgn0264326	DNApol-epsilon255	KO-Ctrl	KO-Zeus	OK	53.8767	87.0639	0.67077	2.92784	0.00341323	0.032228	Significant	1	91.3616	0.2291	1
FBgn0264566	CG43938	KO-Ctrl	KO-Zeus	OK	132.643	27.0998	-2.33532	-8.62174	6.59421e-18	7.42883e-16	Significant	-1	75.5301	0.270864	-1
FBgn0264695	Mhc	KO-Ctrl	KO-Zeus	OK	2366.87	3599.24	0.603759	3.95971	7.50423e-05	0.00146652	Significant	1	3141.61	0.152476	1
FBgn0264699	CG43968	KO-Ctrl	KO-Zeus	OK	18.1189	36.8992	1.03836	3.00525	0.00265366	0.0264698	Significant	1	30.5782	0.345514	1
FBgn0264725	CG43993	KO-Ctrl	KO-Zeus	OK	191.029	105.363	-0.844963	-3.34668	0.000817846	0.0103959	Significant	-1	161.565	0.252478	-1
FBgn0264776	CG44014	KO-Ctrl	KO-Zeus	OK	248.082	125.039	-0.974365	-5.49257	3.96129e-08	1.69848e-06	Significant	-1	174.66	0.177397	-1
FBgn0264836	CG44044	KO-Ctrl	KO-Zeus	OK	15.048	37.6775	1.34504	3.8297	0.000128297	0.00228568	Significant	1	65.8332	0.351211	1
FBgn0264907	CG44098	KO-Ctrl	KO-Zeus	OK	85.9803	139.839	0.688714	3.18679	0.00143862	0.0164818	Significant	1	117.631	0.216116	1
FBgn0264991	CG44142	KO-Ctrl	KO-Zeus	OK	5.80554	0.357021	-3.88959	-2.81851	0.00482474	0.0418739	Significant	-1	4.37987	1.38002	-1
FBgn0265042	Irk1	KO-Ctrl	KO-Zeus	OK	53.9063	94.05	0.77289	3.70491	0.000211464	0.00340327	Significant	1	83.0758	0.208612	1
FBgn0265047	FDY	KO-Ctrl	KO-Zeus	OK	172.589	106.023	-0.701736	-3.59847	0.000320099	0.00477076	Significant	-1	173.878	0.19501	-1
FBgn0265052	St3	KO-Ctrl	KO-Zeus	OK	117.087	198.342	0.775223	4.63353	3.59476e-06	9.90469e-05	Significant	1	138.886	0.167307	1
FBgn0265184	CG44249	KO-Ctrl	KO-Zeus	OK	34.2458	54.2498	0.636431	2.54796	0.0108355	0.0736313	Significant	1	36.2364	0.24978	1
FBgn0265186	CG44251	KO-Ctrl	KO-Zeus	OK	130.36	72.207	-0.854756	-4.85654	1.19458e-06	3.67028e-05	Significant	-1	129.657	0.176001	-1
FBgn0265266	CG13639	KO-Ctrl	KO-Zeus	OK	339.76	172.705	-0.962131	-6.08992	1.12965e-09	5.98192e-08	Significant	-1	330.341	0.157987	-1
FBgn0265538	CG44388	KO-Ctrl	KO-Zeus	OK	1243.38	723.514	-0.779365	-4.40677	1.04926e-05	0.00026154	Significant	-1	1096.49	0.176856	-1
FBgn0265610	CG44428	KO-Ctrl	KO-Zeus	OK	27.3696	14.135	-0.976487	-2.67573	0.00745669	0.0563716	Significant	-1	26.6905	0.364943	-1
FBgn0266100	CG44837	KO-Ctrl	KO-Zeus	OK	37.0154	61.6507	0.738328	2.63986	0.00829401	0.0608598	Significant	1	58.3195	0.279684	1
FBgn0266347	nAChRalpha4	KO-Ctrl	KO-Zeus	OK	158.719	89.6618	-0.83471	-5.01914	5.1903e-07	1.76455e-05	Significant	-1	136.436	0.166305	-1
FBgn0266917	Sf3a1	KO-Ctrl	KO-Zeus	OK	492.716	764.59	0.628125	4.5859	4.52043e-06	0.000122222	Significant	1	548.675	0.136969	1
FBgn0283461	Drs	KO-Ctrl	KO-Zeus	OK	227.996	101.326	-1.15867	-5.10362	3.3321e-07	1.17092e-05	Significant	-1	184.579	0.227029	-1
FBgn0283480	Alp2	KO-Ctrl	KO-Zeus	OK	915.547	2091.81	1.1891	13.5716	5.9058e-42	3.39318e-39	Significant	1	1415.47	0.0876169	1
FBgn0284247	ds	KO-Ctrl	KO-Zeus	OK	43.1356	67.5133	0.641204	3.11413	0.00184491	0.020027	Significant	1	101.064	0.205902	1
FBgn0284442	Mcm3	KO-Ctrl	KO-Zeus	OK	96.3778	60.3455	-0.673444	-2.98469	0.00283866	0.027892	Significant	-1	75.5764	0.225633	-1

## Sheet: Table S10
Supplementary Table 10. GO biological process analysis of DEGs by Zeus-KO testes RNA-seq in D. melanogaster
GO biological process complete	Drosophila melanogaster - REFLIST (13811)	upload_1 (321)	upload_1 (expected)	upload_1 (over/under)	upload_1 (fold Enrichment)	upload_1 (raw P-value)	upload_1 (FDR)	group
cellular process (GO:0009987)	7278	92	169.16	-	0.54	9.59e-18	7.5e-14	Down-regulated DEGs
cellular metabolic process (GO:0044237)	3831	37	89.04	-	0.42	4.09e-12	1.6e-08	Down-regulated DEGs
cellular macromolecule metabolic process (GO:0044260)	2192	12	50.95	-	0.24	1.44e-11	3.75e-08	Down-regulated DEGs
cellular protein metabolic process (GO:0044267)	1658	7	38.54	-	0.18	2.25e-10	4.4e-07	Down-regulated DEGs
cellular component organization or biogenesis (GO:0071840)	2810	26	65.31	-	0.4	3.34e-09	5.23e-06	Down-regulated DEGs
organelle organization (GO:0006996)	1770	11	41.14	-	0.27	1.21e-08	1.57e-05	Down-regulated DEGs
gene expression (GO:0010467)	1120	3	26.03	-	0.12	1.48e-08	1.65e-05	Down-regulated DEGs
humoral immune response (GO:0006959)	46	11	1.07	+	10.29	5.09e-08	4.42e-05	Down-regulated DEGs
cellular component organization (GO:0016043)	2656	26	61.73	-	0.42	4.94e-08	4.83e-05	Down-regulated DEGs
RNA metabolic process (GO:0016070)	819	1	19.04	-	0.05	1.67e-07	0.000131	Down-regulated DEGs
antimicrobial humoral response (GO:0019730)	33	9	0.77	+	11.73	3.32e-07	0.000216	Down-regulated DEGs
regulation of biological process (GO:0050789)	3954	52	91.9	-	0.57	3.28e-07	0.000233	Down-regulated DEGs
macromolecule biosynthetic process (GO:0009059)	766	1	17.8	-	0.06	5.5e-07	0.000307	Down-regulated DEGs
macromolecule modification (GO:0043412)	1207	6	28.05	-	0.21	5.23e-07	0.000315	Down-regulated DEGs
antibacterial humoral response (GO:0019731)	26	8	0.6	+	13.24	7.05e-07	0.000367	Down-regulated DEGs
cellular macromolecule biosynthetic process (GO:0034645)	747	1	17.36	-	0.06	8.11e-07	0.000396	Down-regulated DEGs
regulation of cellular process (GO:0050794)	3684	48	85.62	-	0.56	9.48e-07	0.000436	Down-regulated DEGs
cellular localization (GO:0051641)	1010	4	23.47	-	0.17	1.53e-06	0.000665	Down-regulated DEGs
regulation of macromolecule metabolic process (GO:0060255)	2008	19	46.67	-	0.41	2.37e-06	0.000925	Down-regulated DEGs
defense response (GO:0006952)	358	25	8.32	+	3	2.27e-06	0.000933	Down-regulated DEGs
biological regulation (GO:0065007)	4391	64	102.06	-	0.63	3.42e-06	0.00127	Down-regulated DEGs
cellular protein modification process (GO:0006464)	1110	6	25.8	-	0.23	4.63e-06	0.00158	Down-regulated DEGs
protein modification process (GO:0036211)	1110	6	25.8	-	0.23	4.63e-06	0.00165	Down-regulated DEGs
nucleic acid metabolic process (GO:0090304)	1079	6	25.08	-	0.24	6.38e-06	0.00199	Down-regulated DEGs
intracellular transport (GO:0046907)	667	1	15.5	-	0.06	6.11e-06	0.00199	Down-regulated DEGs
regulation of metabolic process (GO:0019222)	2168	23	50.39	-	0.46	7.43e-06	0.00223	Down-regulated DEGs
positive regulation of macromolecule metabolic process (GO:0010604)	831	3	19.31	-	0.16	1.04e-05	0.003	Down-regulated DEGs
positive regulation of cellular process (GO:0048522)	1598	14	37.14	-	0.38	1.11e-05	0.0031	Down-regulated DEGs
nucleobase-containing compound metabolic process (GO:0006139)	1339	10	31.12	-	0.32	1.19e-05	0.00311	Down-regulated DEGs
cellular aromatic compound metabolic process (GO:0006725)	1465	12	34.05	-	0.35	1.18e-05	0.00318	Down-regulated DEGs
cellular nitrogen compound metabolic process (GO:0034641)	1771	17	41.16	-	0.41	1.28e-05	0.00323	Down-regulated DEGs
establishment of localization in cell (GO:0051649)	802	3	18.64	-	0.16	1.43e-05	0.00348	Down-regulated DEGs
regulation of gene expression (GO:0010468)	1634	15	37.98	-	0.39	2e-05	0.00473	Down-regulated DEGs
positive regulation of biological process (GO:0048518)	1733	17	40.28	-	0.42	2.34e-05	0.00538	Down-regulated DEGs
macromolecule metabolic process (GO:0043170)	3164	43	73.54	-	0.58	2.69e-05	0.006	Down-regulated DEGs
positive regulation of metabolic process (GO:0009893)	920	5	21.38	-	0.23	3.16e-05	0.00668	Down-regulated DEGs
cellular component biogenesis (GO:0044085)	1214	9	28.22	-	0.32	3.09e-05	0.00671	Down-regulated DEGs
organic cyclic compound metabolic process (GO:1901360)	1526	14	35.47	-	0.39	3.84e-05	0.00791	Down-regulated DEGs
cytoskeleton organization (GO:0007010)	575	1	13.36	-	0.07	4.08e-05	0.00818	Down-regulated DEGs
cell development (GO:0048468)	1270	10	29.52	-	0.34	4.43e-05	0.00824	Down-regulated DEGs
cellular macromolecule localization (GO:0070727)	580	1	13.48	-	0.07	4.23e-05	0.00827	Down-regulated DEGs
positive regulation of nitrogen compound metabolic process (GO:0051173)	756	3	17.57	-	0.17	4.36e-05	0.00831	Down-regulated DEGs
regulation of nitrogen compound metabolic process (GO:0051171)	1821	19	42.32	-	0.45	4.86e-05	0.00883	Down-regulated DEGs
RNA processing (GO:0006396)	553	1	12.85	-	0.08	5.89e-05	0.0105	Down-regulated DEGs
heterocycle metabolic process (GO:0046483)	1419	13	32.98	-	0.39	7.37e-05	0.0128	Down-regulated DEGs
localization (GO:0051179)	2240	27	52.06	-	0.52	7.81e-05	0.0133	Down-regulated DEGs
negative regulation of biological process (GO:0048519)	1453	14	33.77	-	0.41	0.000128	0.0208	Down-regulated DEGs
cellular protein localization (GO:0034613)	525	1	12.2	-	0.08	0.00013	0.0208	Down-regulated DEGs
regulation of cellular metabolic process (GO:0031323)	1979	23	46	-	0.5	0.000127	0.0212	Down-regulated DEGs
response to bacterium (GO:0009617)	233	16	5.42	+	2.95	0.000186	0.0265	Down-regulated DEGs
protein localization (GO:0008104)	687	3	15.97	-	0.19	0.000185	0.0267	Down-regulated DEGs
mating (GO:0007618)	140	12	3.25	+	3.69	0.000183	0.0269	Down-regulated DEGs
gamete generation (GO:0007276)	904	6	21.01	-	0.29	0.000192	0.0269	Down-regulated DEGs
positive regulation of cellular metabolic process (GO:0031325)	841	5	19.55	-	0.26	0.000179	0.027	Down-regulated DEGs
nitrogen compound metabolic process (GO:0006807)	3616	55	84.04	-	0.65	0.000178	0.0273	Down-regulated DEGs
nitrogen compound transport (GO:0071705)	599	2	13.92	-	0.14	0.000201	0.0276	Down-regulated DEGs
cellular process involved in reproduction in multicellular organism (GO:0022412)	839	5	19.5	-	0.26	0.000178	0.0278	Down-regulated DEGs
antifungal humoral response (GO:0019732)	3	3	0.07	+	43.02	0.000221	0.0297	Down-regulated DEGs
cellular developmental process (GO:0048869)	1588	17	36.91	-	0.46	0.000237	0.0309	Down-regulated DEGs
cell differentiation (GO:0030154)	1576	17	36.63	-	0.46	0.000237	0.0314	Down-regulated DEGs
response to biotic stimulus (GO:0009607)	390	22	9.06	+	2.43	0.000256	0.0317	Down-regulated DEGs
response to other organism (GO:0051707)	390	22	9.06	+	2.43	0.000256	0.0322	Down-regulated DEGs
developmental process involved in reproduction (GO:0003006)	881	6	20.48	-	0.29	0.000265	0.0323	Down-regulated DEGs
response to external biotic stimulus (GO:0043207)	390	22	9.06	+	2.43	0.000256	0.0328	Down-regulated DEGs
regulation of primary metabolic process (GO:0080090)	1850	22	43	-	0.51	0.000316	0.038	Down-regulated DEGs
immune response (GO:0006955)	373	21	8.67	+	2.42	0.000373	0.0441	Down-regulated DEGs
regulation of female receptivity (GO:0045924)	37	6	0.86	+	6.98	0.000393	0.0459	Down-regulated DEGs
regulation of nucleobase-containing compound metabolic process (GO:0019219)	1371	14	31.87	-	0.44	0.000401	0.0461	Down-regulated DEGs
biosynthetic process (GO:0009058)	1301	13	30.24	-	0.43	0.00043	0.048	Down-regulated DEGs
cellular nitrogen compound biosynthetic process (GO:0044271)	712	4	16.55	-	0.24	0.000428	0.0485	Down-regulated DEGs
defense response to bacterium (GO:0042742)	203	14	4.72	+	2.97	0.000447	0.0493	Down-regulated DEGs
cellular biosynthetic process (GO:0044249)	1238	12	28.77	-	0.42	0.000457	0.0497	Down-regulated DEGs
transmembrane transport (GO:0055085)	660	52	15.63	+	3.33	1.12e-13	8.76e-10	Up-regulated DEGs
ion transport (GO:0006811)	490	30	11.6	+	2.59	4.02e-06	0.0105	Up-regulated DEGs
transport (GO:0006810)	1723	69	40.8	+	1.69	1.53e-05	0.0239	Up-regulated DEGs
establishment of localization (GO:0051234)	1780	70	42.14	+	1.66	2.83e-05	0.0316	Up-regulated DEGs
cellular macromolecule metabolic process (GO:0044260)	2192	23	51.9	-	0.44	3.15e-06	0.0123	Up-regulated DEGs
cellular protein metabolic process (GO:0044267)	1658	15	39.26	-	0.38	8e-06	0.0156	Up-regulated DEGs
macromolecule modification (GO:0043412)	1207	9	28.58	-	0.31	2.25e-05	0.0293	Up-regulated DEGs
intracellular transport (GO:0046907)	667	2	15.79	-	0.13	3.07e-05	0.03	Up-regulated DEGs
Analysis Type: PANTHER Overrepresentation Test (Released 20210224) Annotation Version and Release Date: GO Ontology database DOI: 10.5281/zenodo.5080993 Released 2021-07-02 Reference List: Drosophila melanogaster (all genes in database) Test Type: FISHER Correction: FDR
